# Supplementary material for: Synthesis of α-fluoro-β-hydroxy esters by an enantioselective Reformatsky-type reaction
Source: Royal Society of Chemistry journal article supplement (doi:10.1039/c2cc17985g), 2012-01-01

## Electronic Supporting Information

### Synthesis of $\alpha$ -Fluoro- $\beta$ -hydroxy Esters by an Enantioselective Reformatsky-type Reaction

Michal Fornalczyk, Kuldip Singh and Alison M. Stuart\*

Department of Chemistry, University of Leicester, Leicester, LE1 7RH, UK.

Email: [Alison.Stuart@le.ac.uk](mailto:Alison.Stuart@le.ac.uk)

**$^1\text{H}$ ,  $^{19}\text{F}$  and  $^{13}\text{C}$  NMR Data**

S40

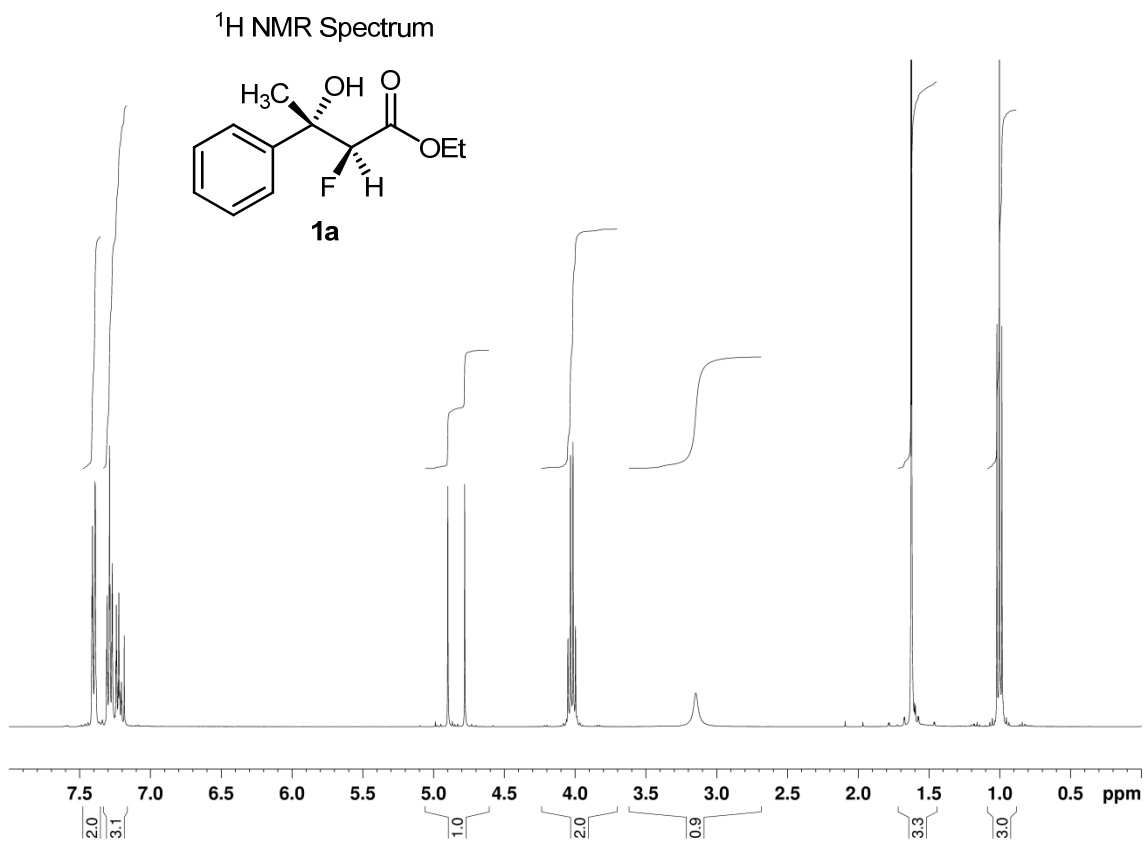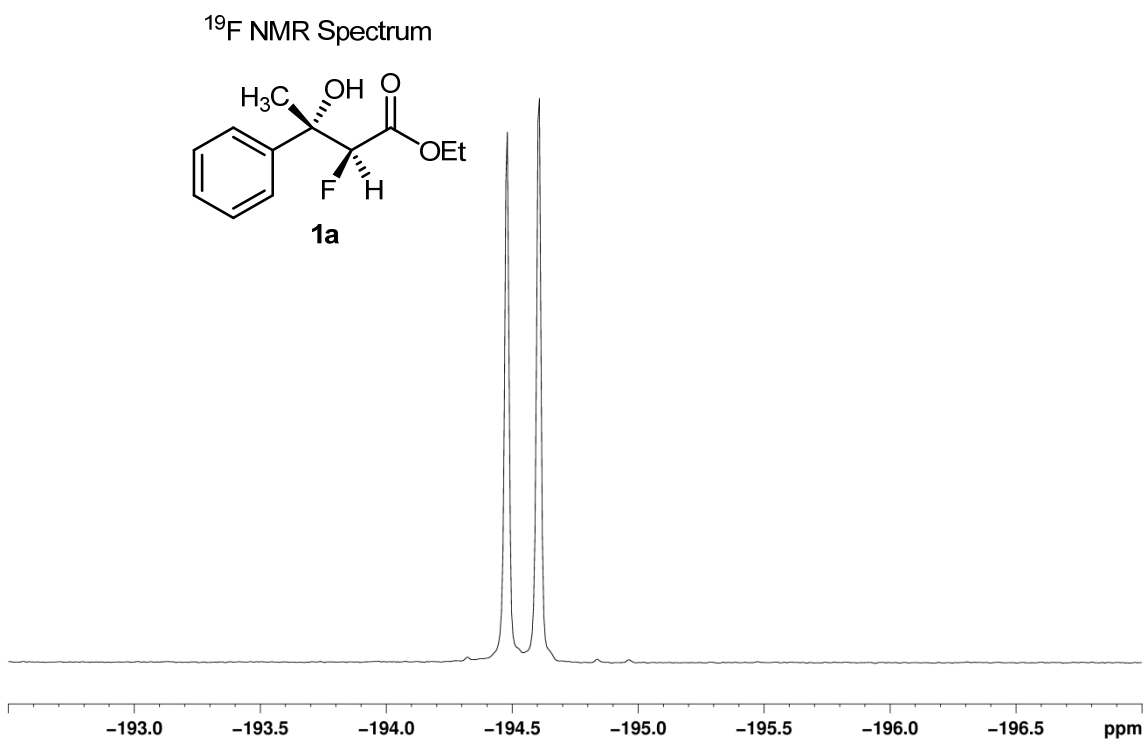

<sup>13</sup>C NMR Spectrum

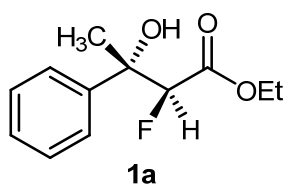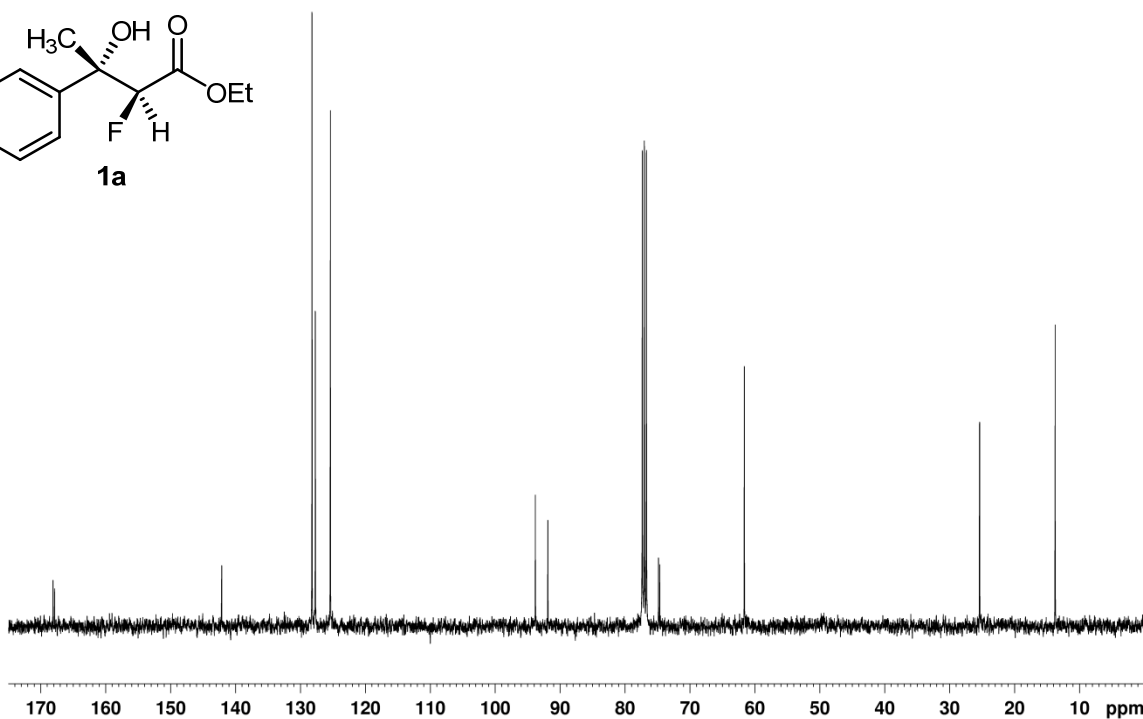

<sup>1</sup>H NMR Spectrum

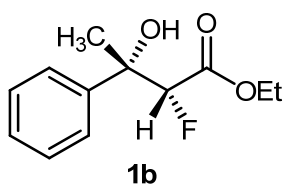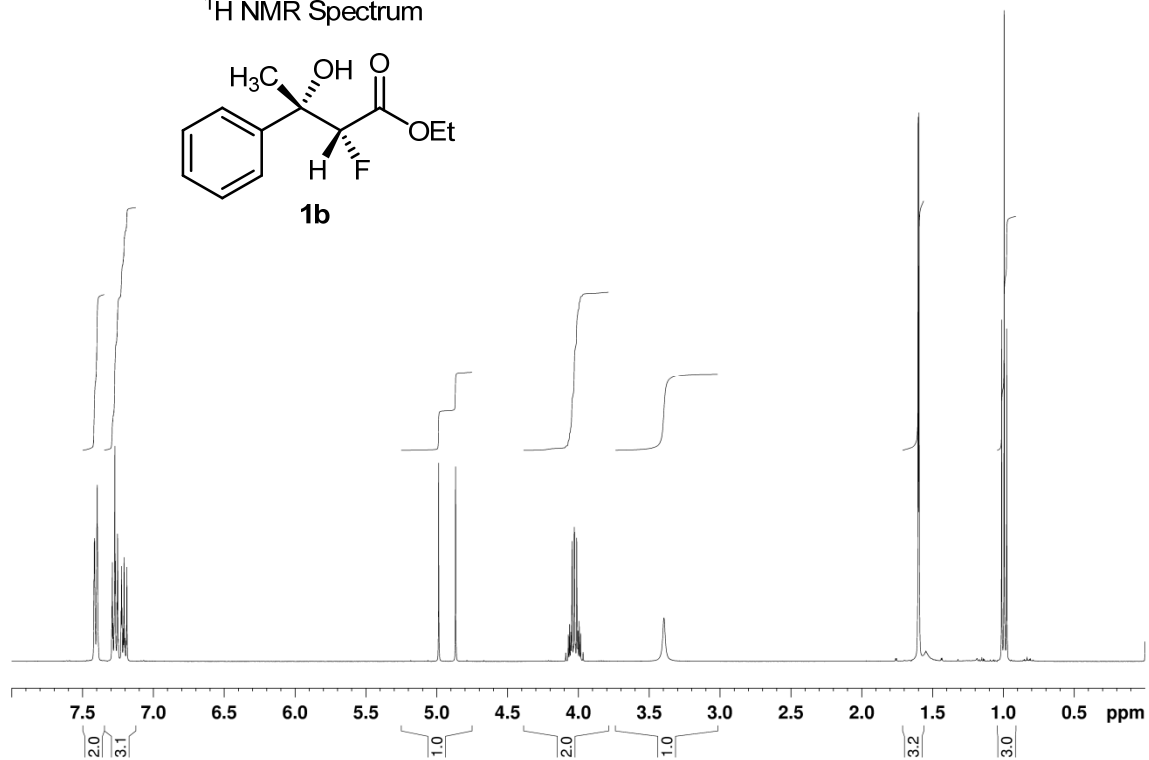

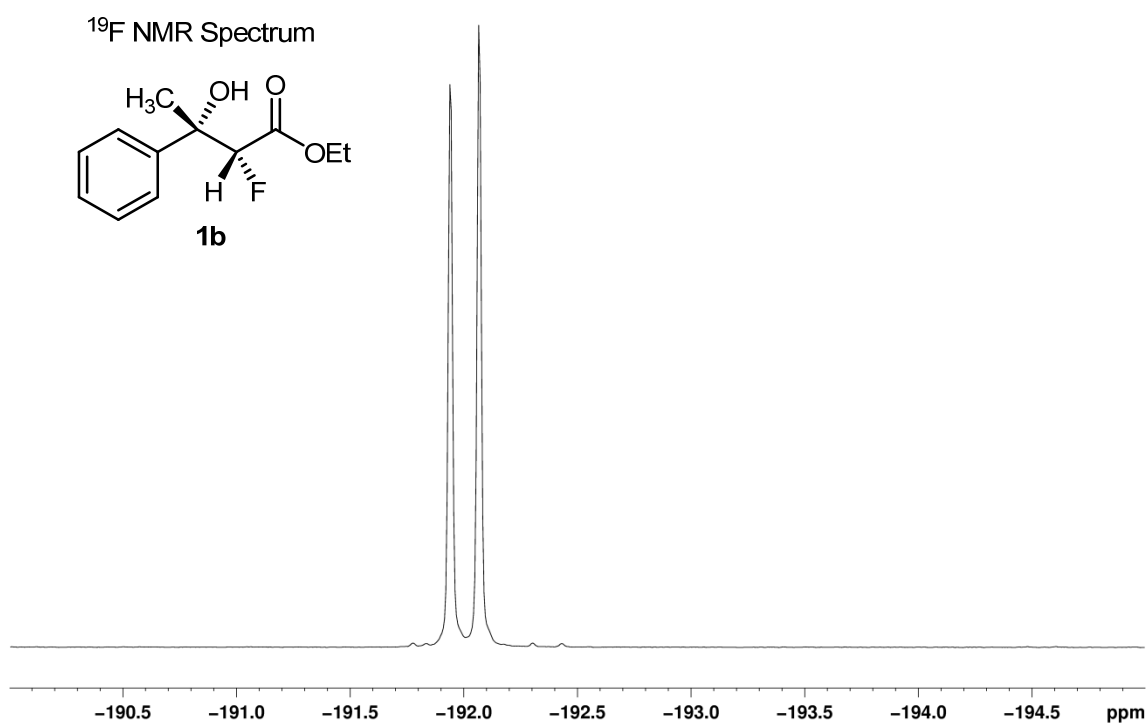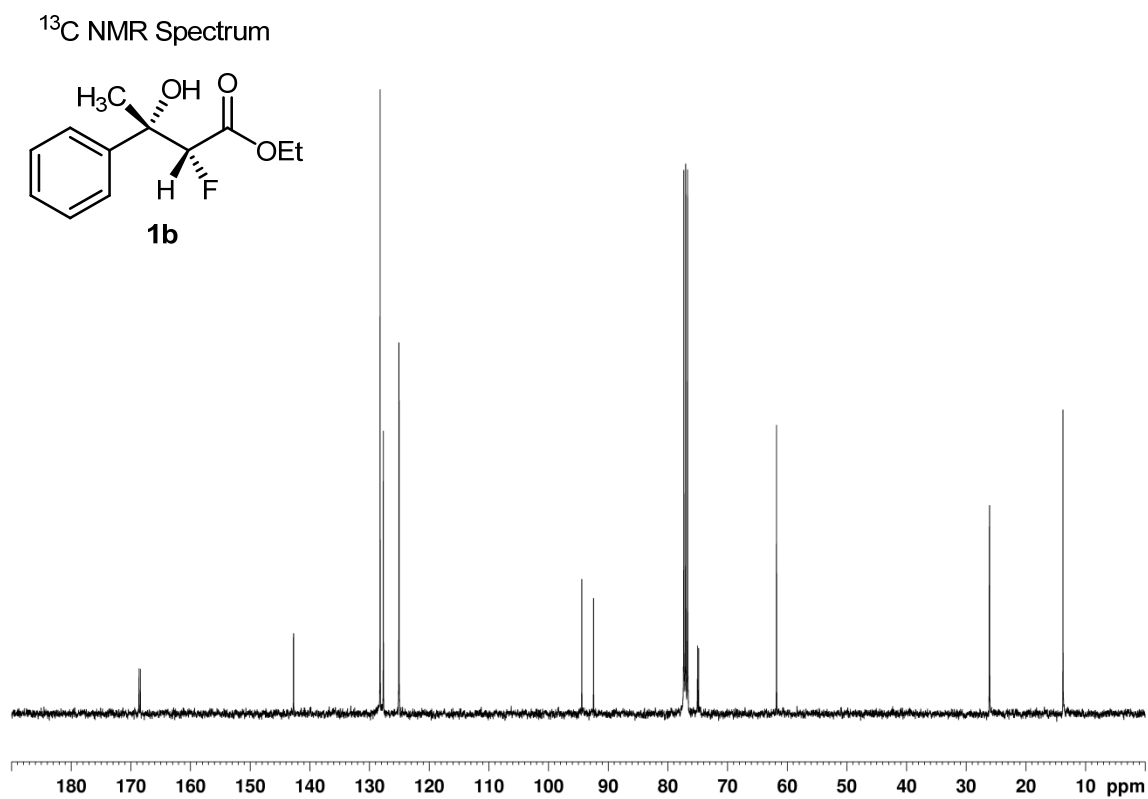

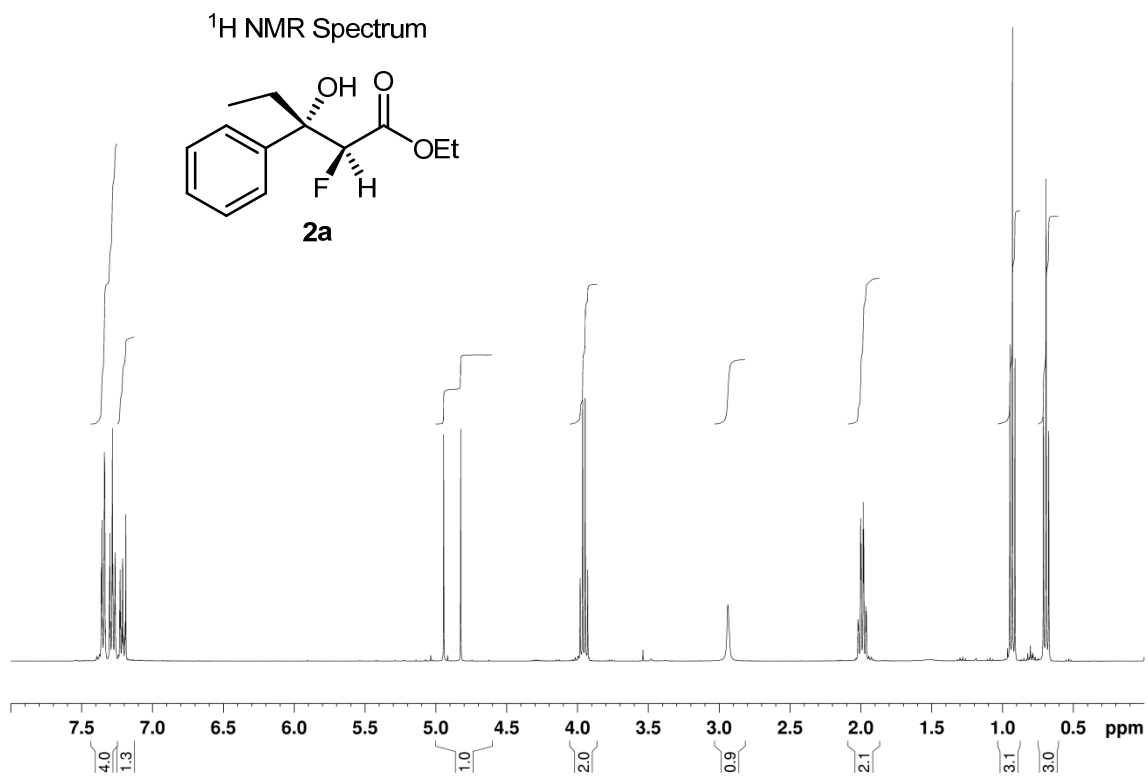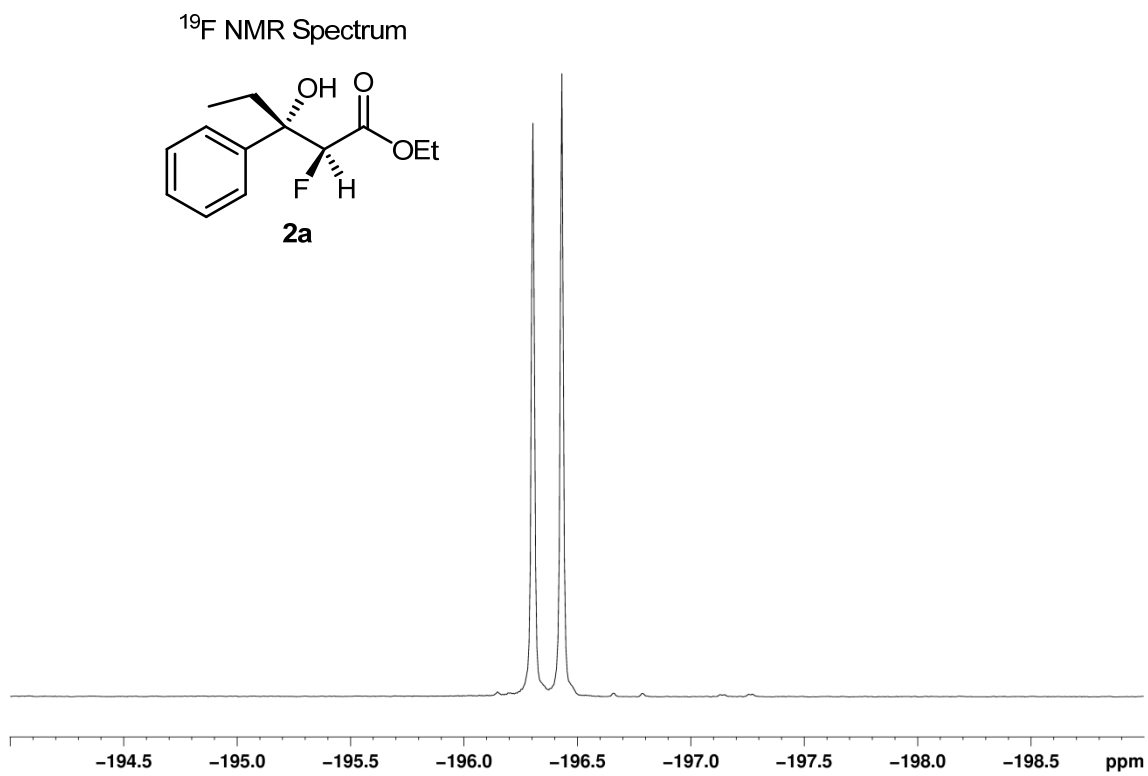

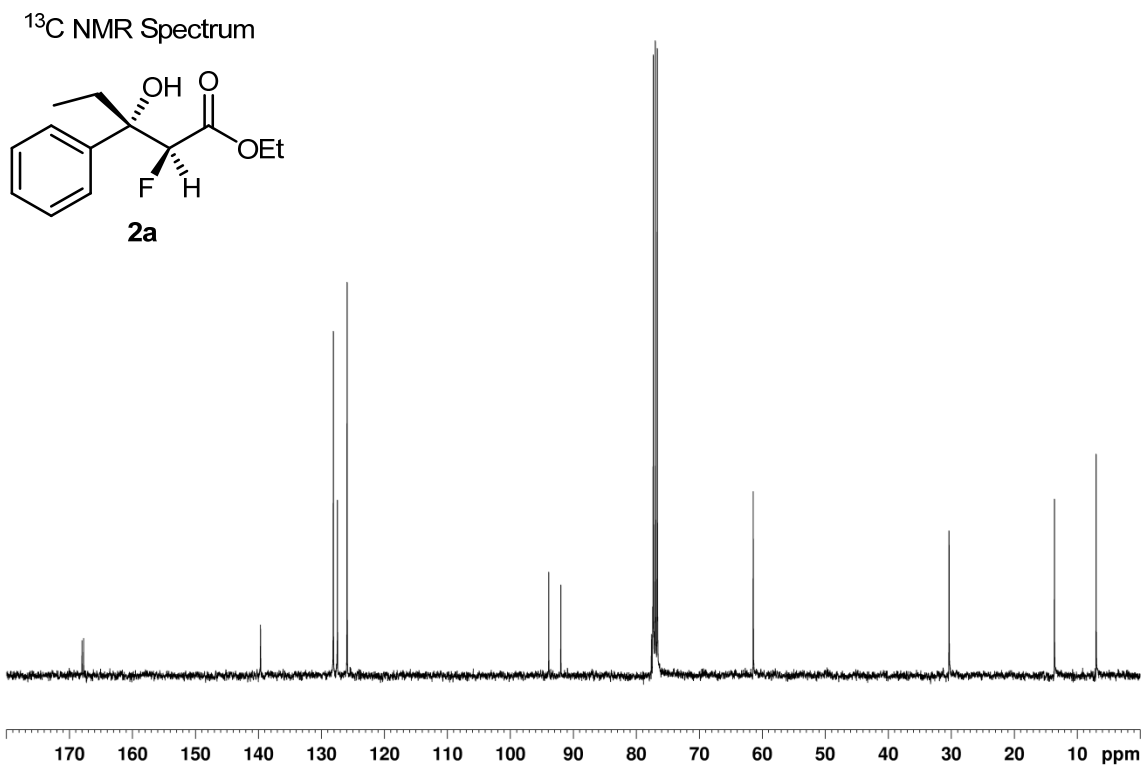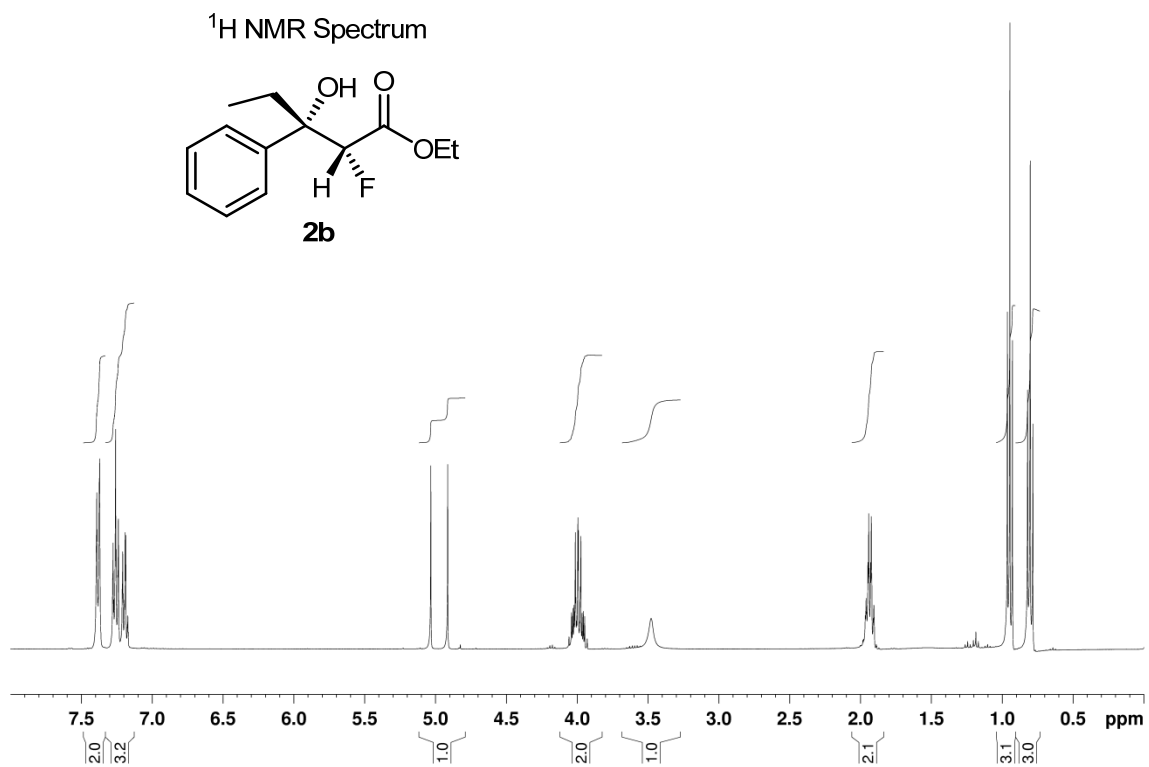

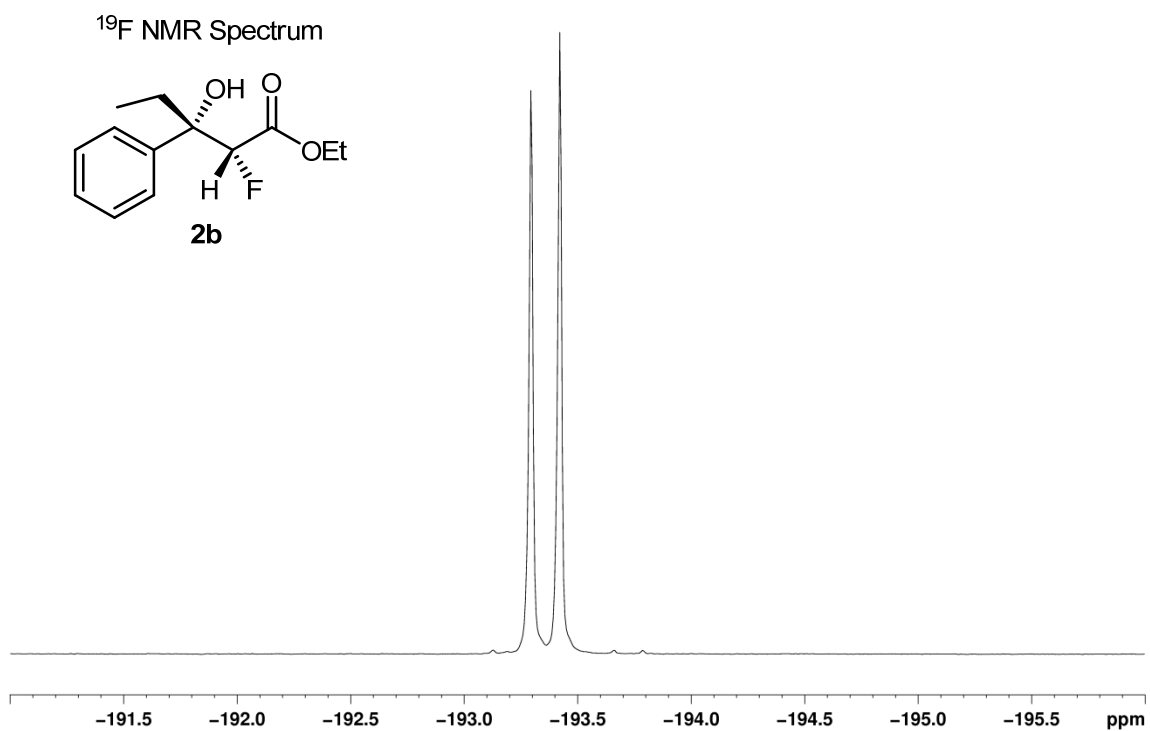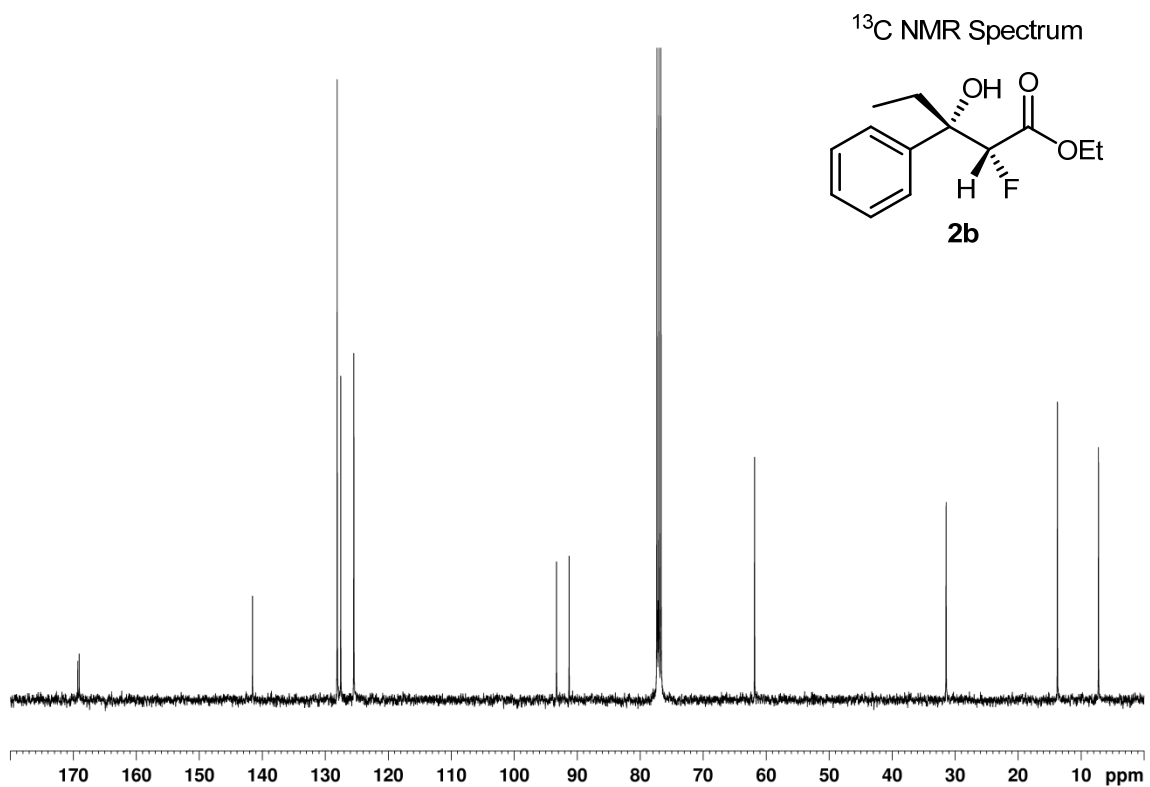

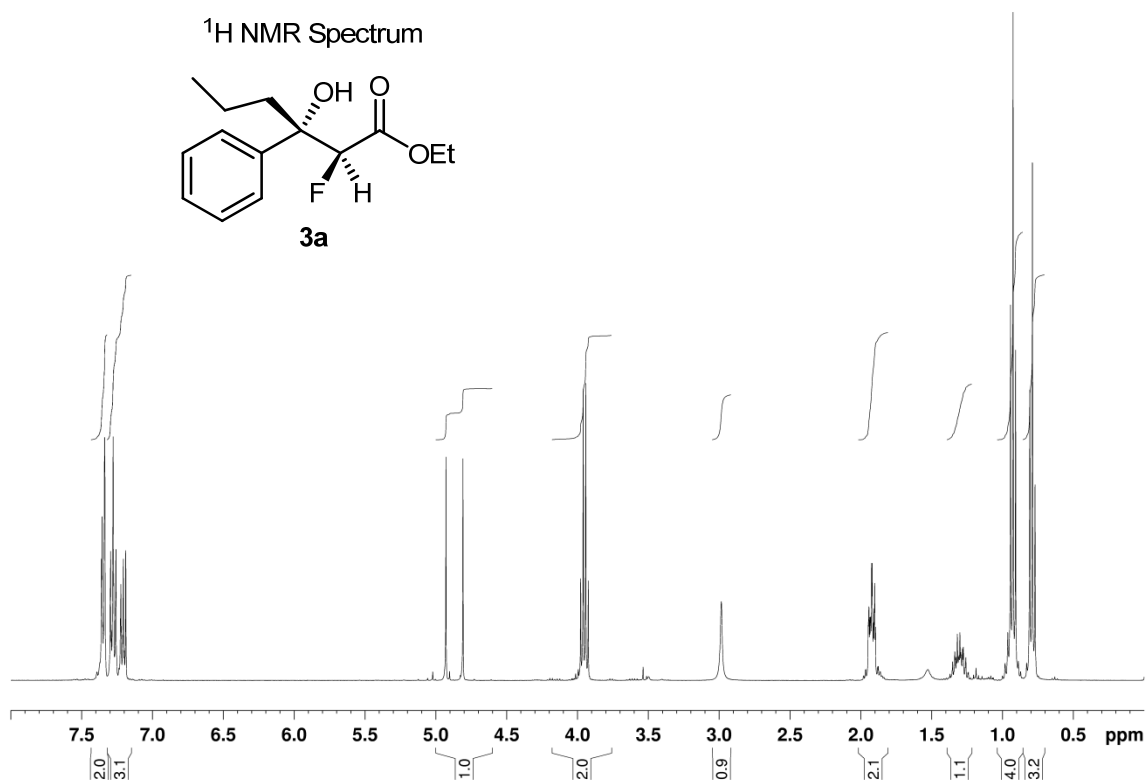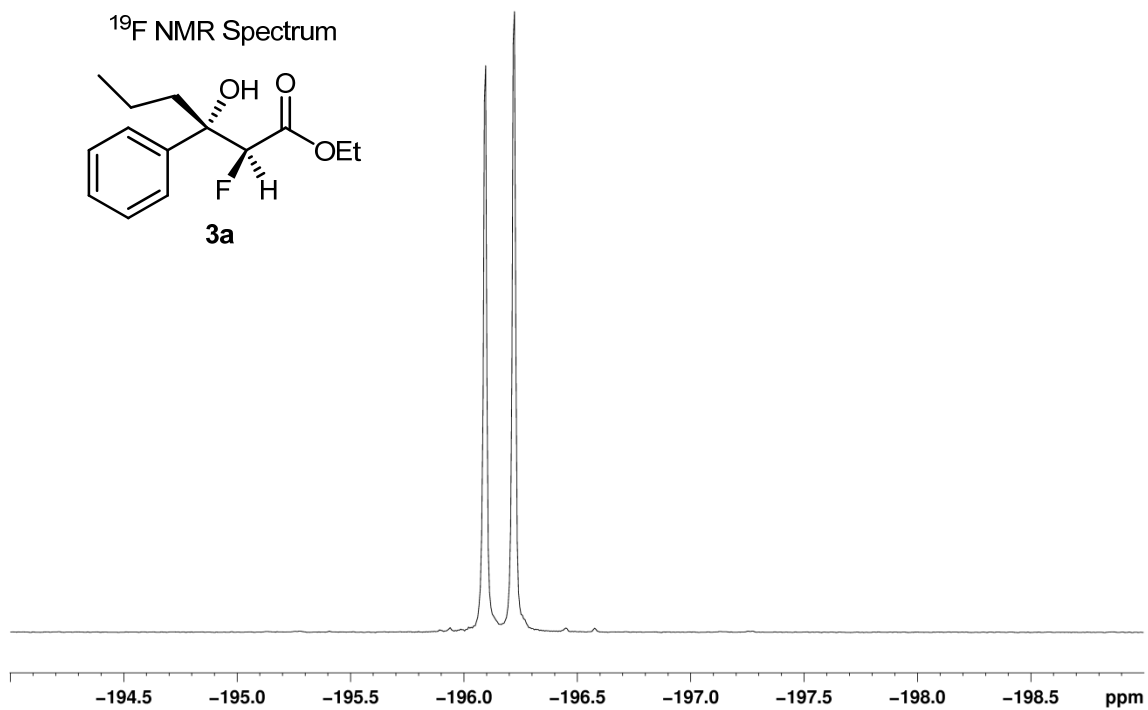



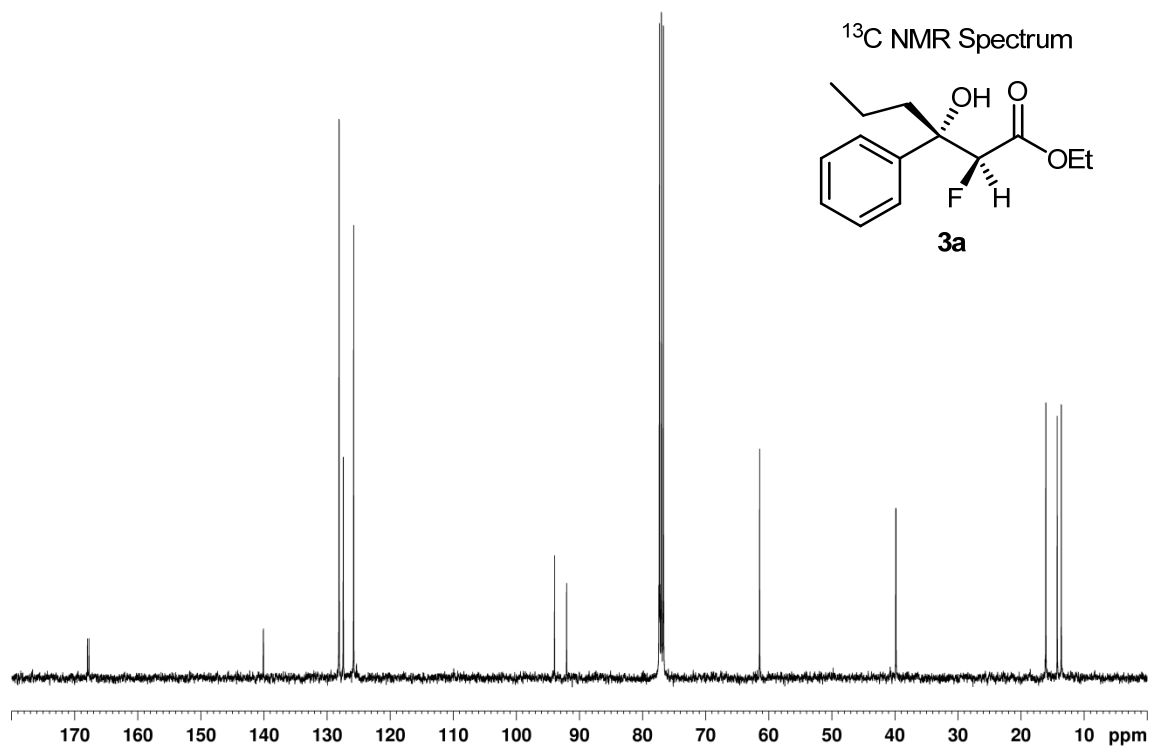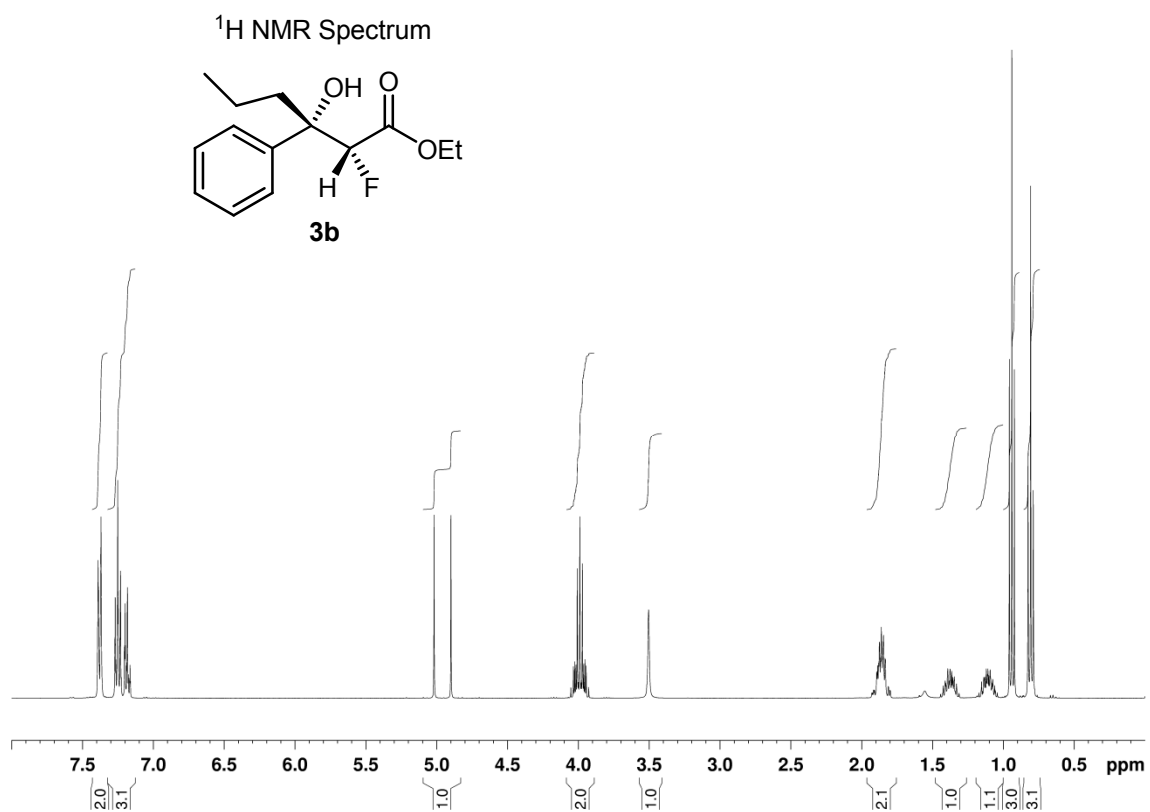

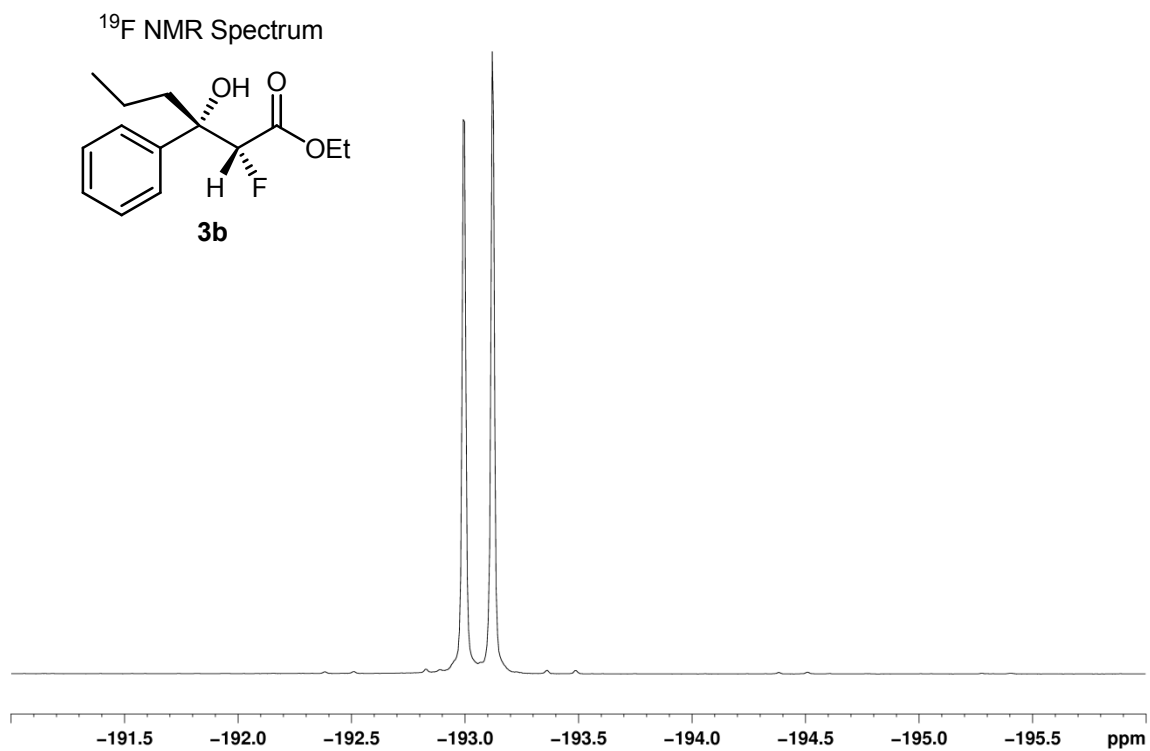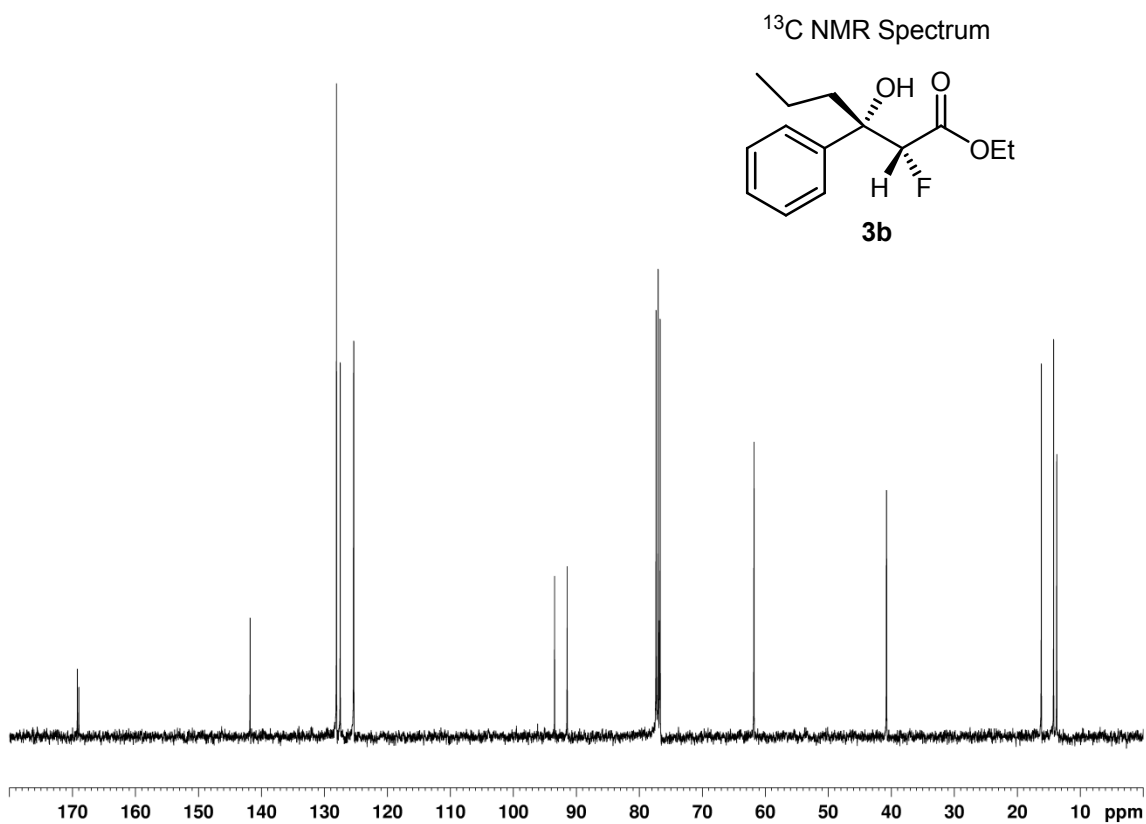

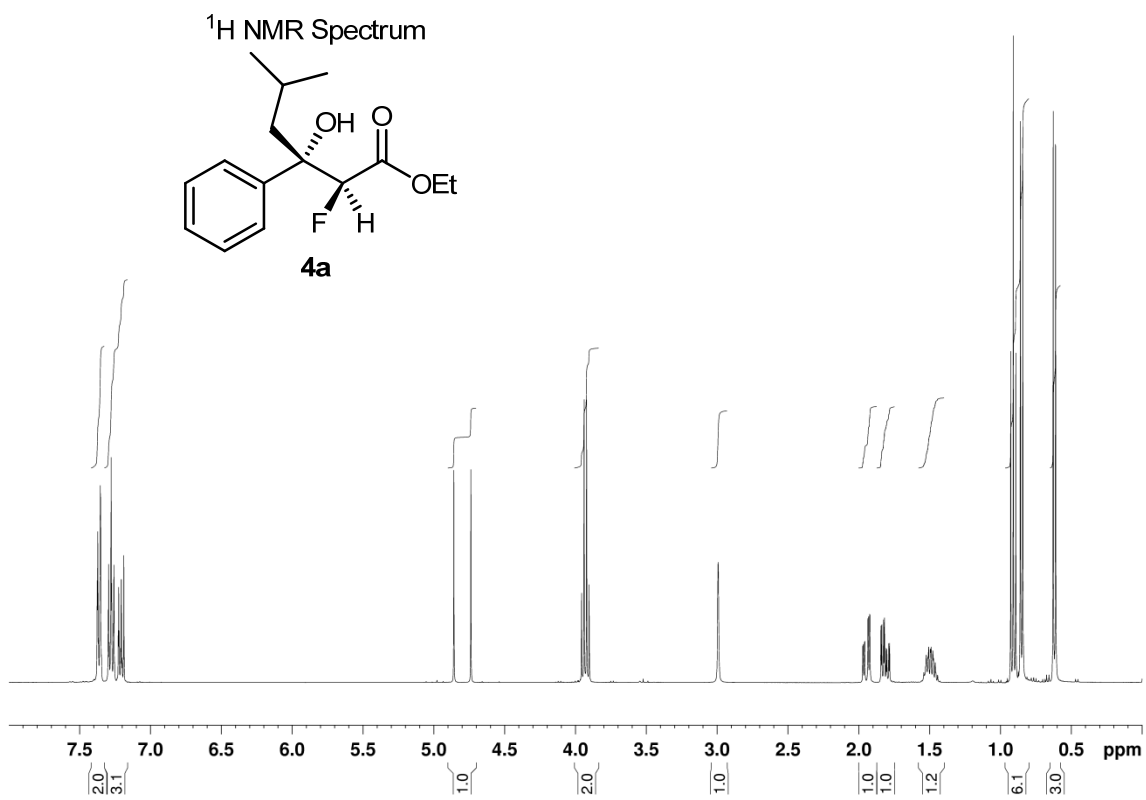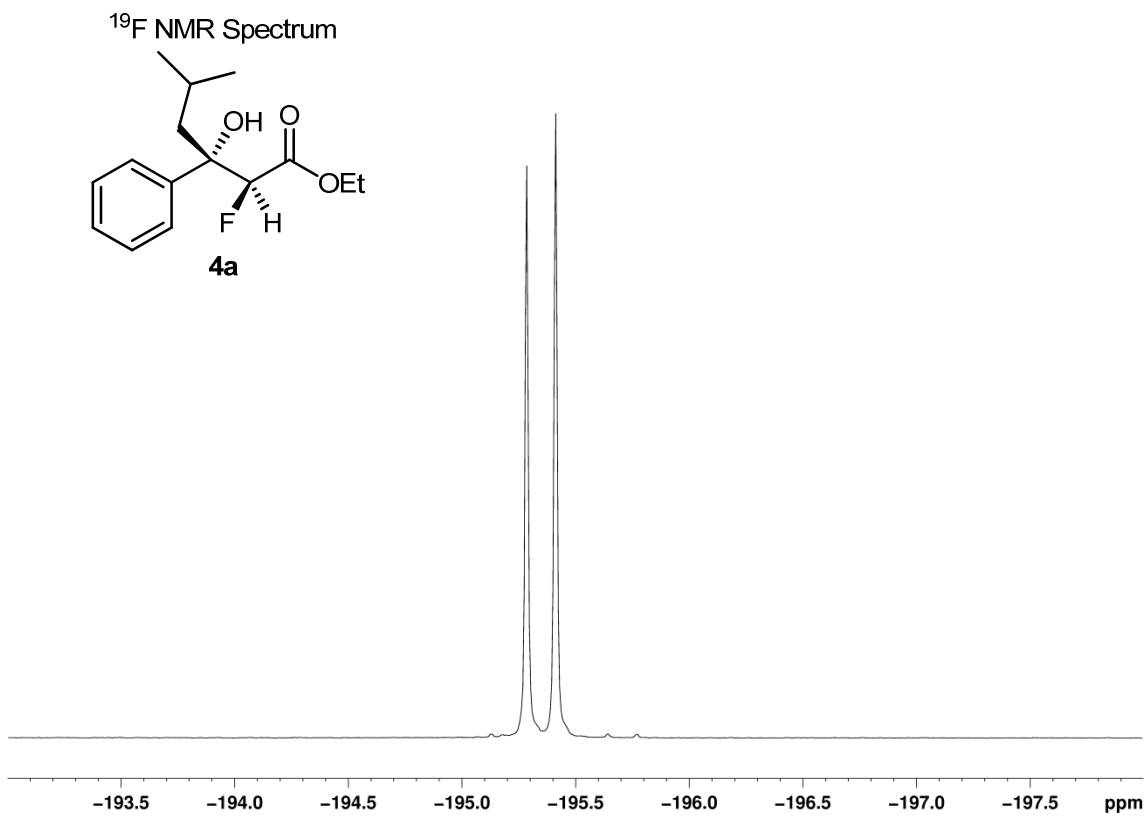

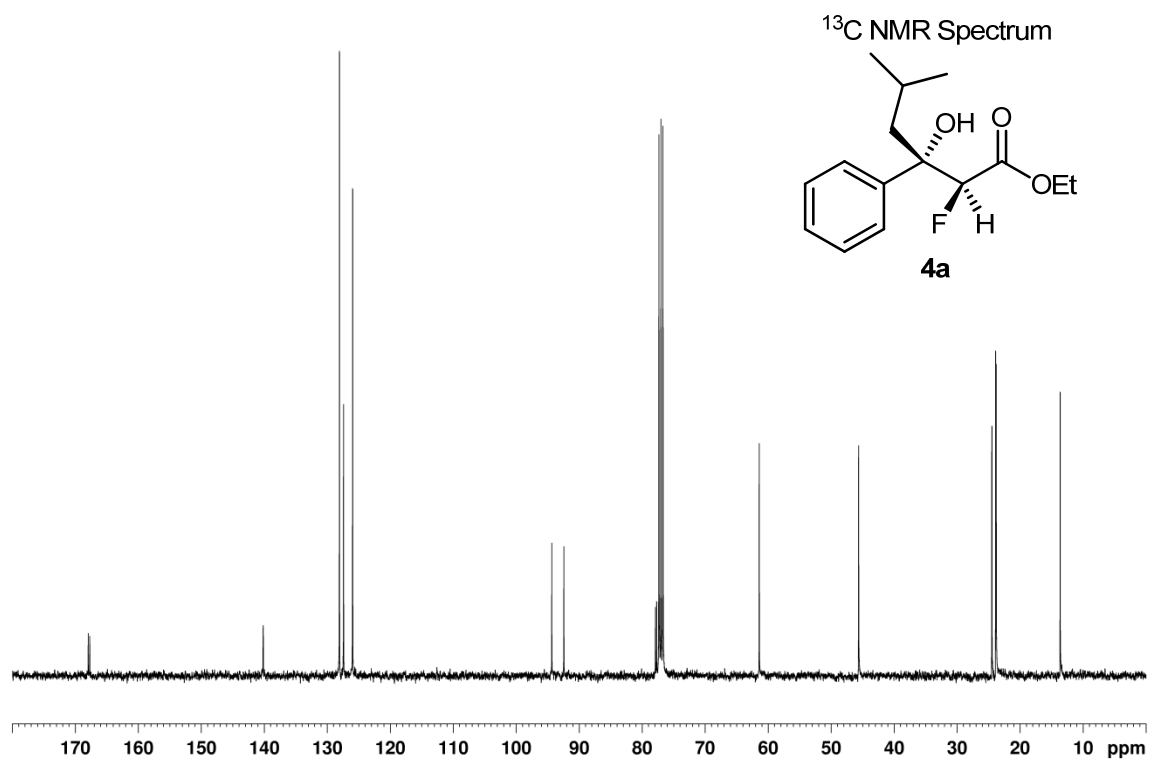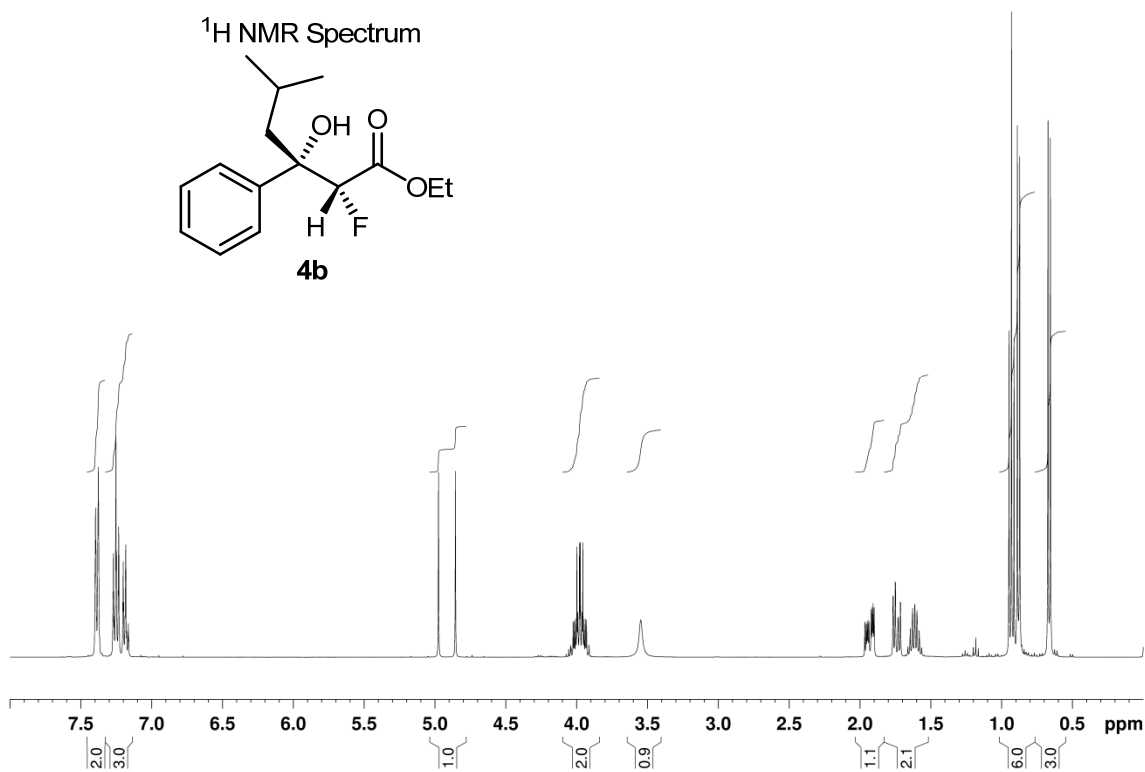

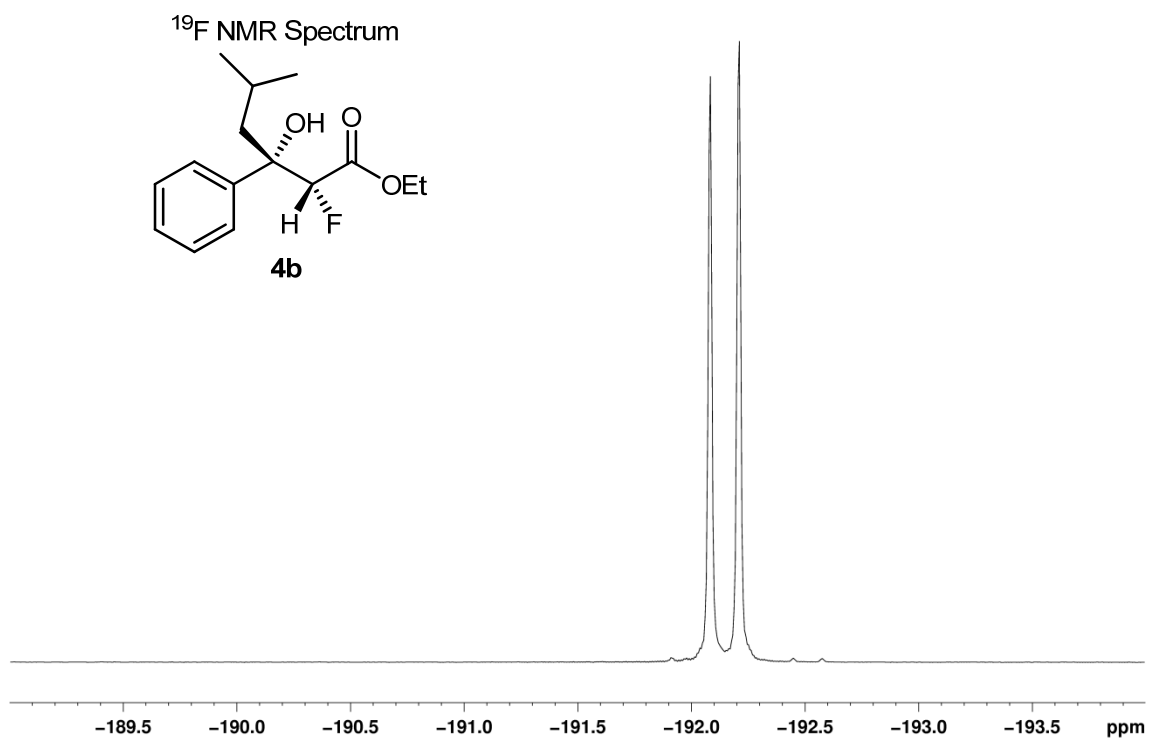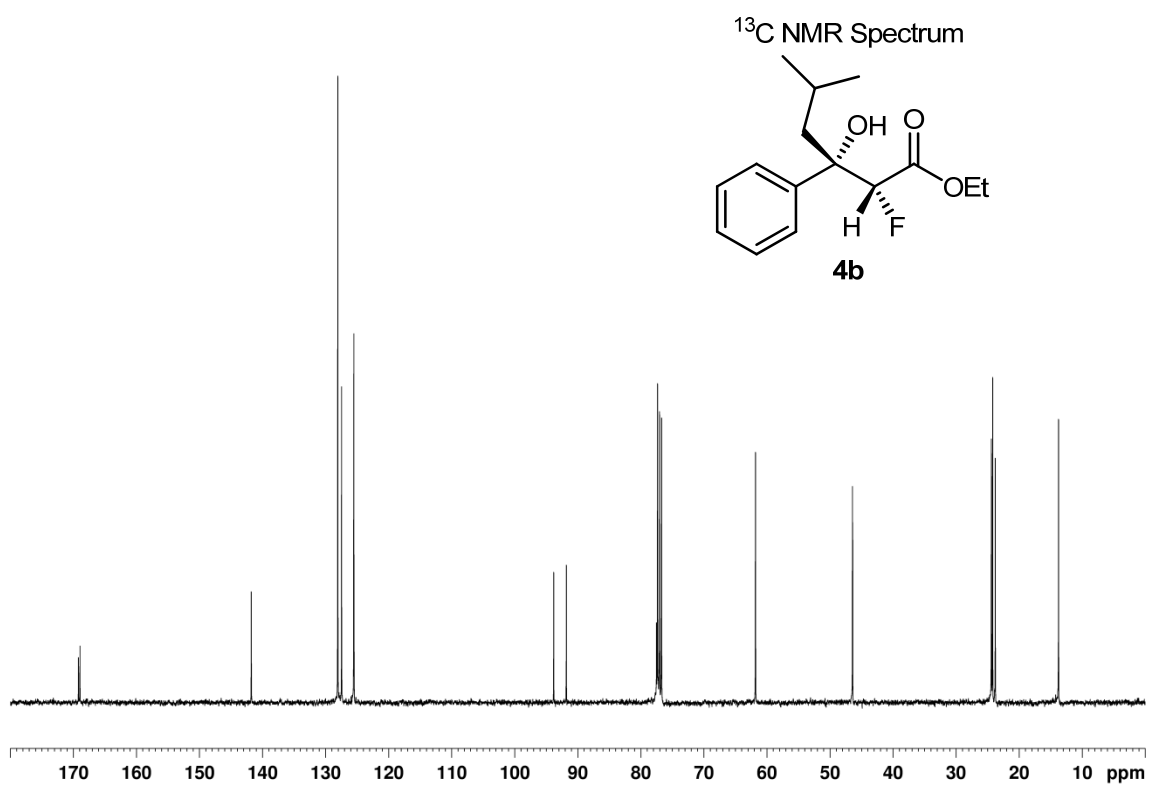

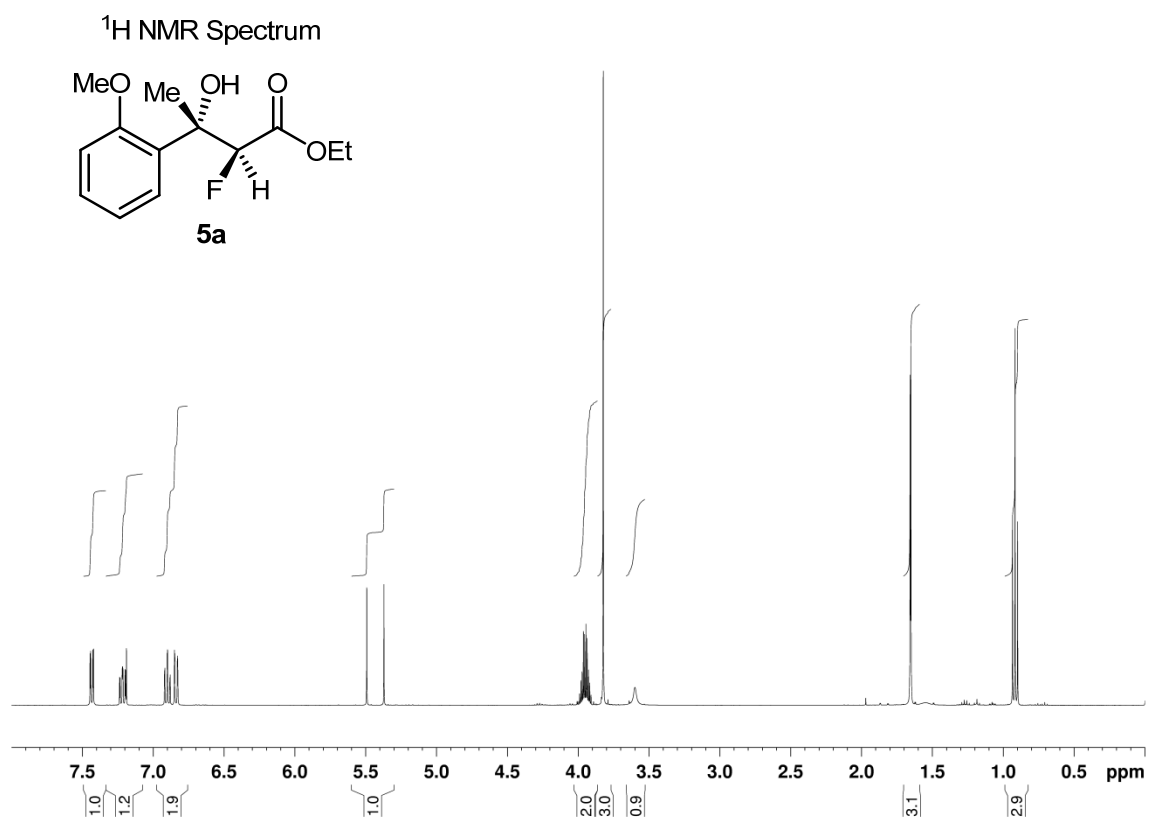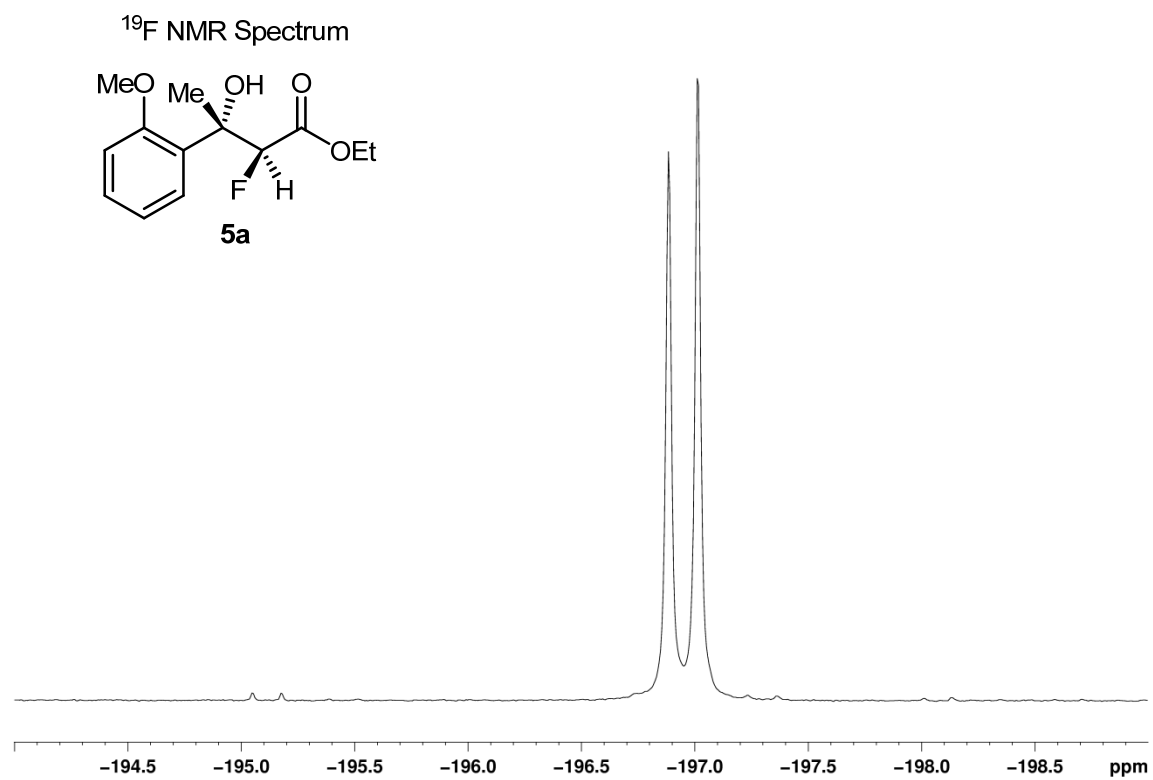

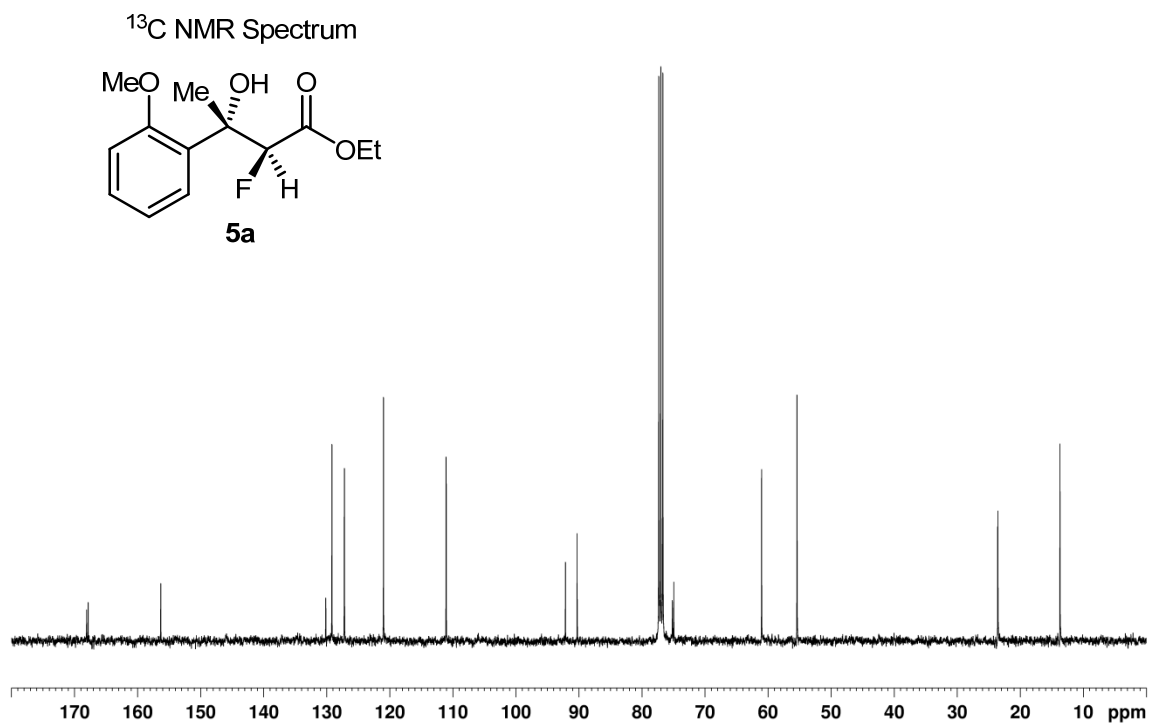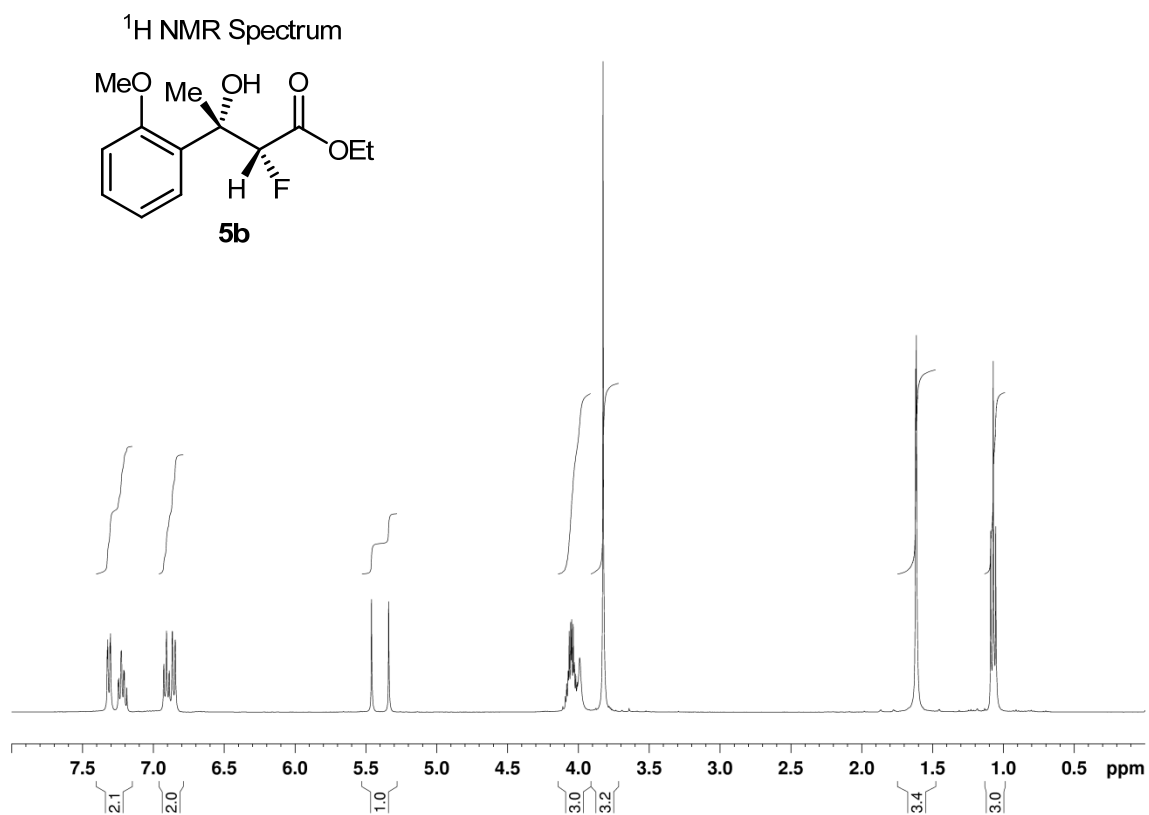

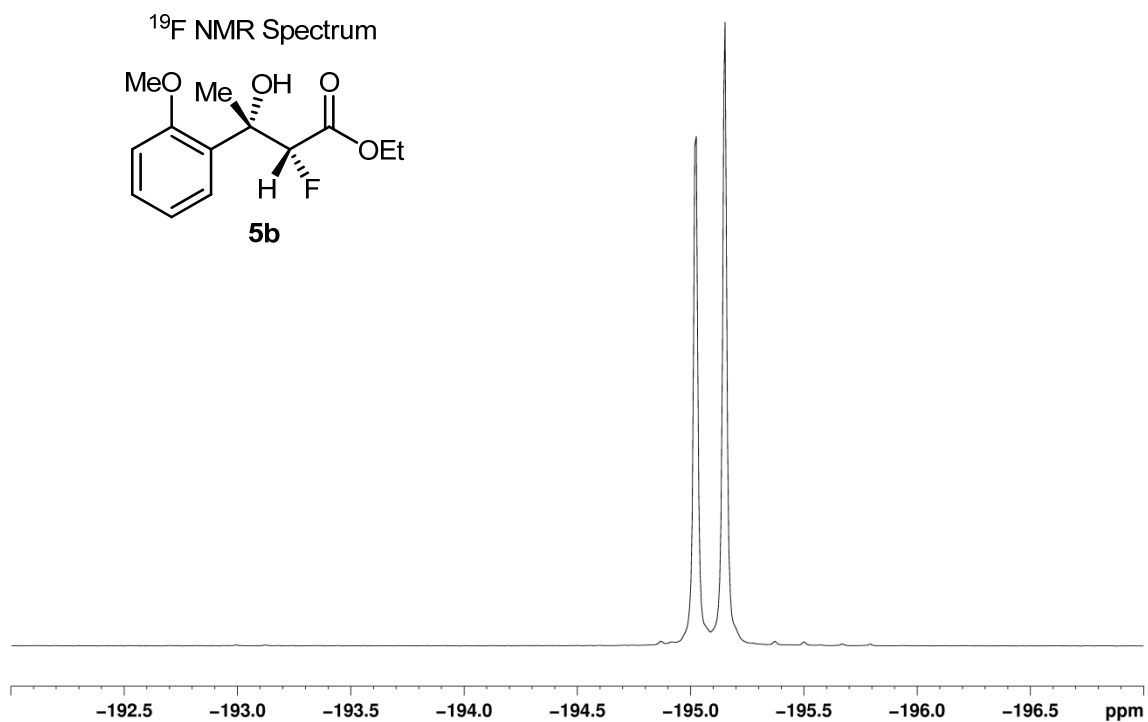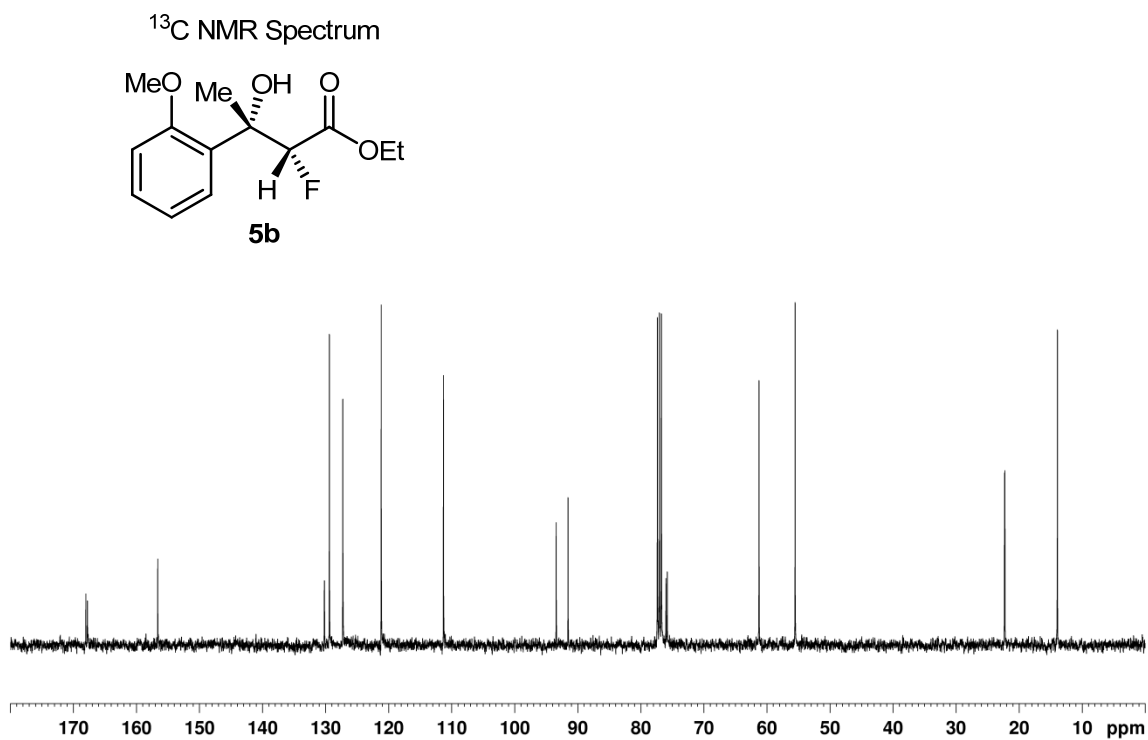



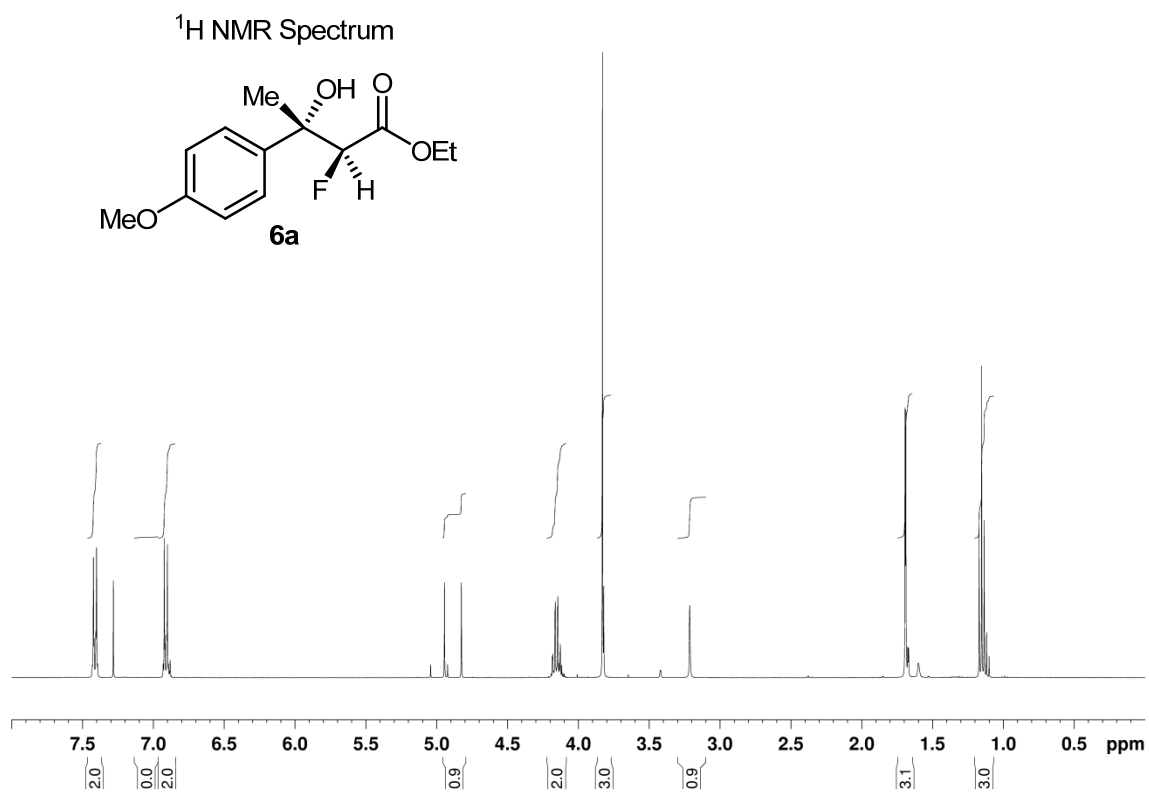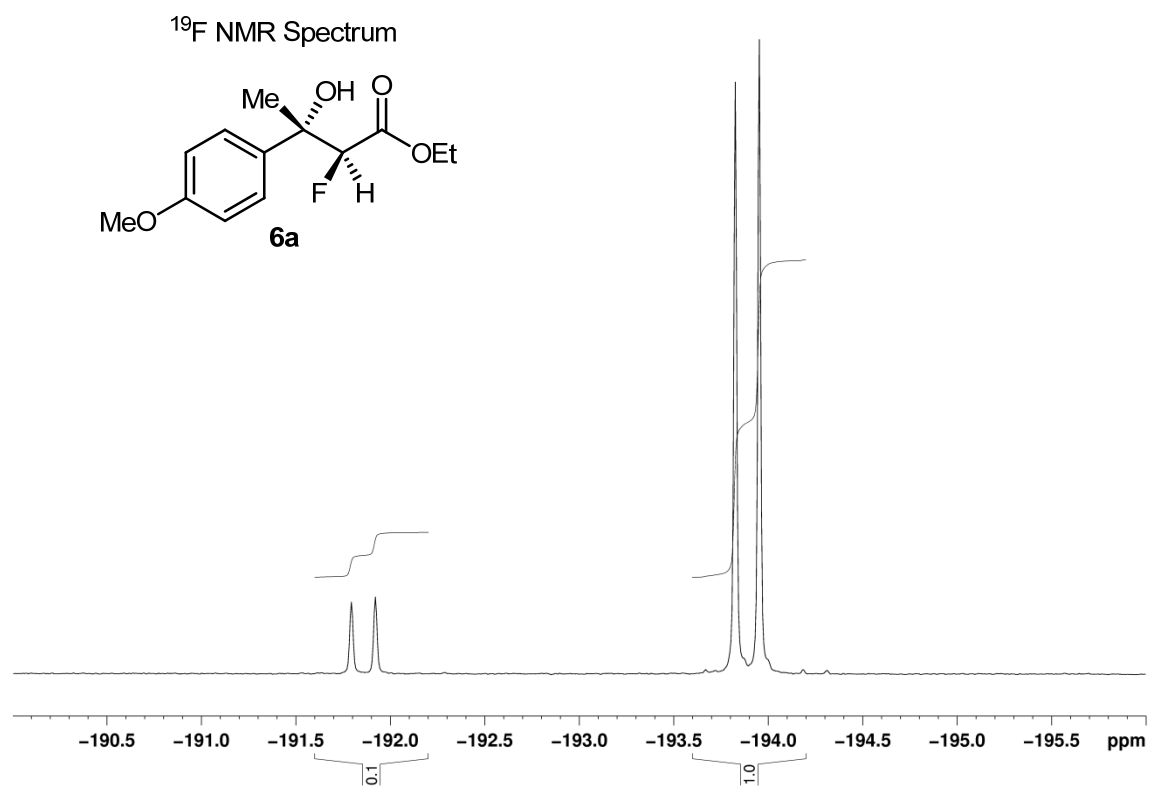

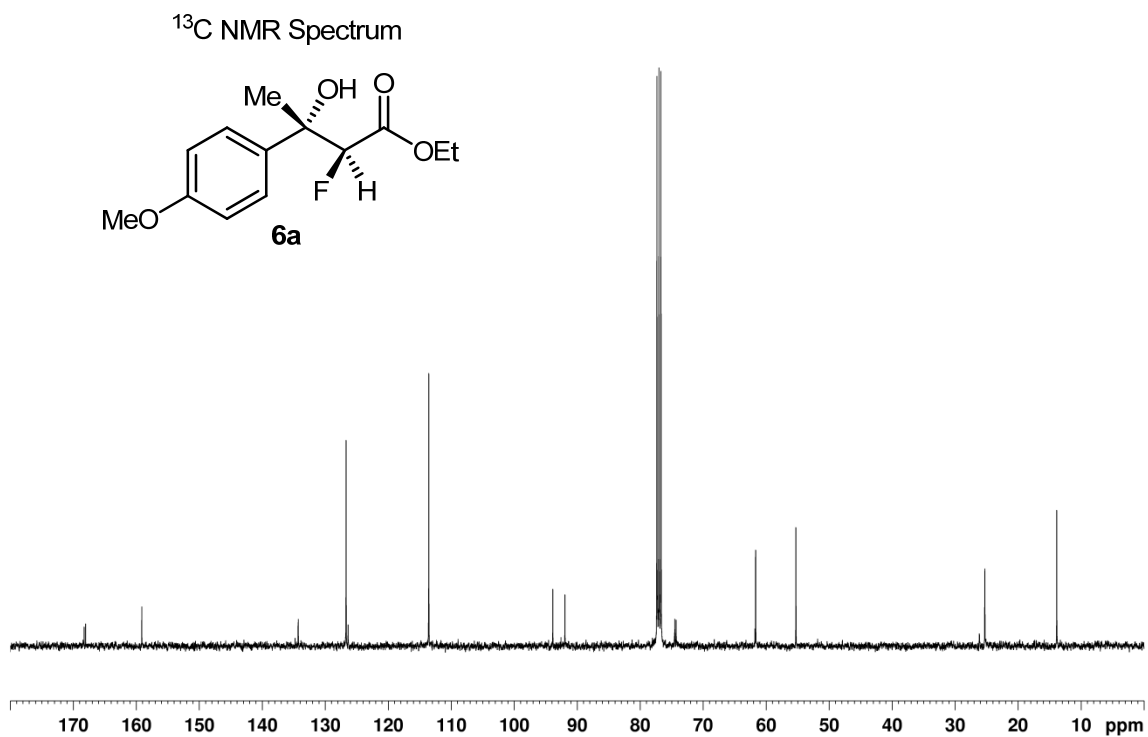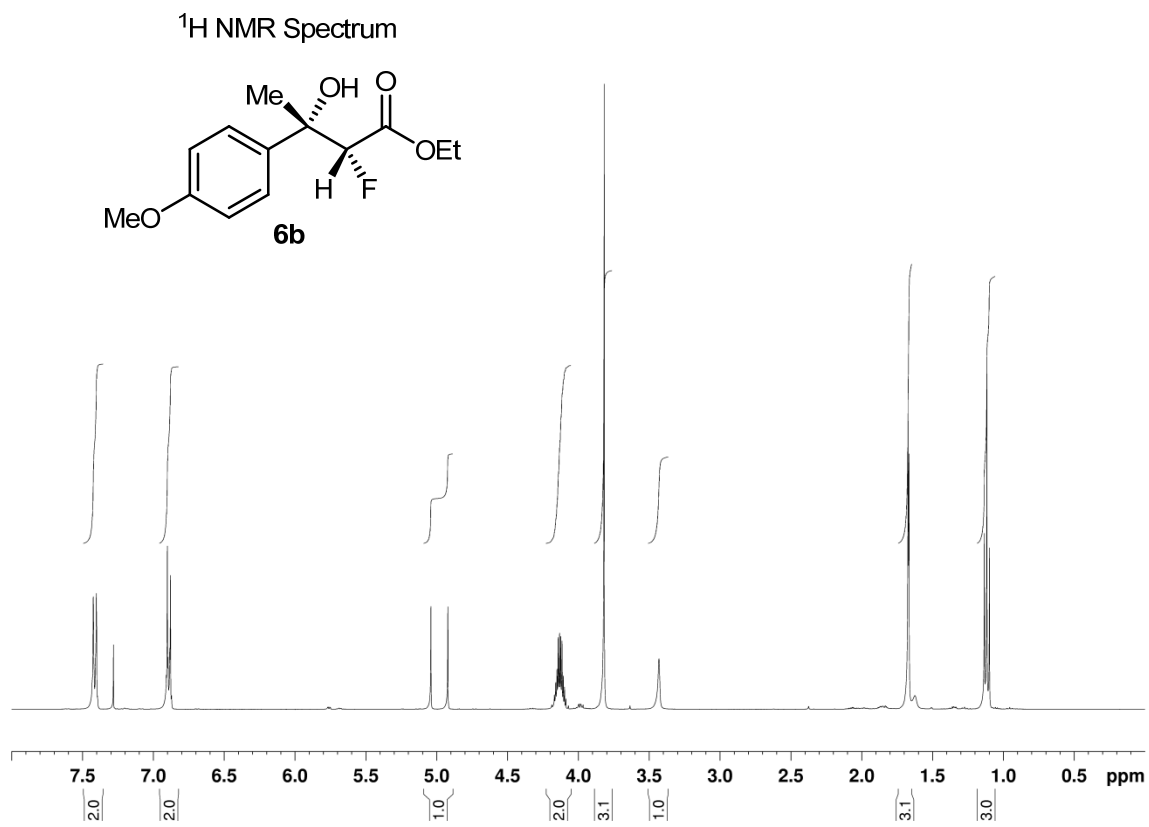

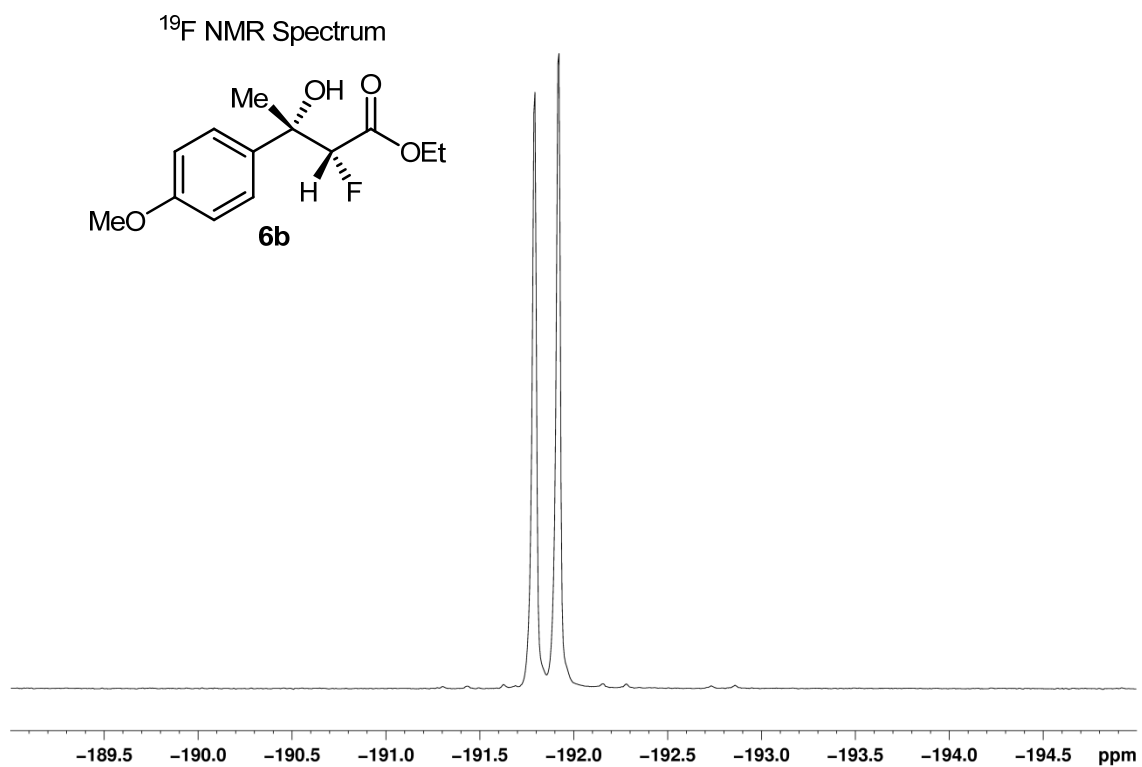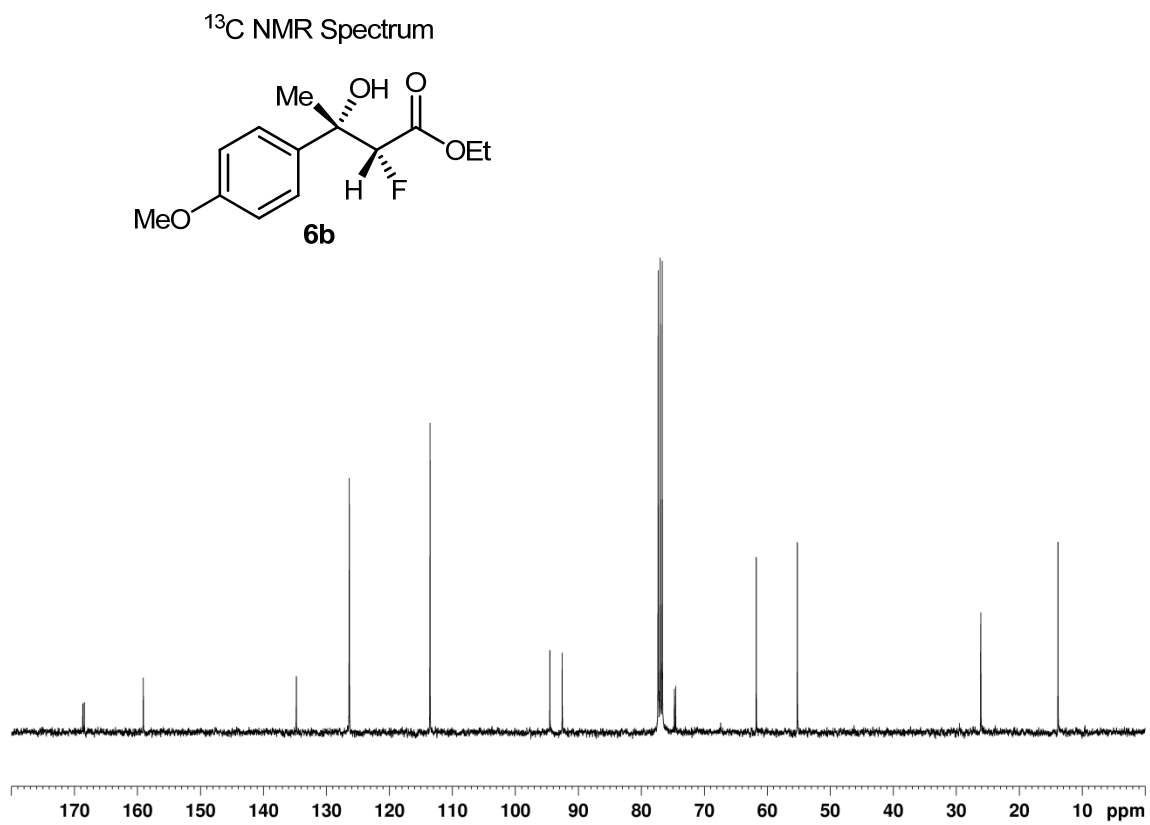

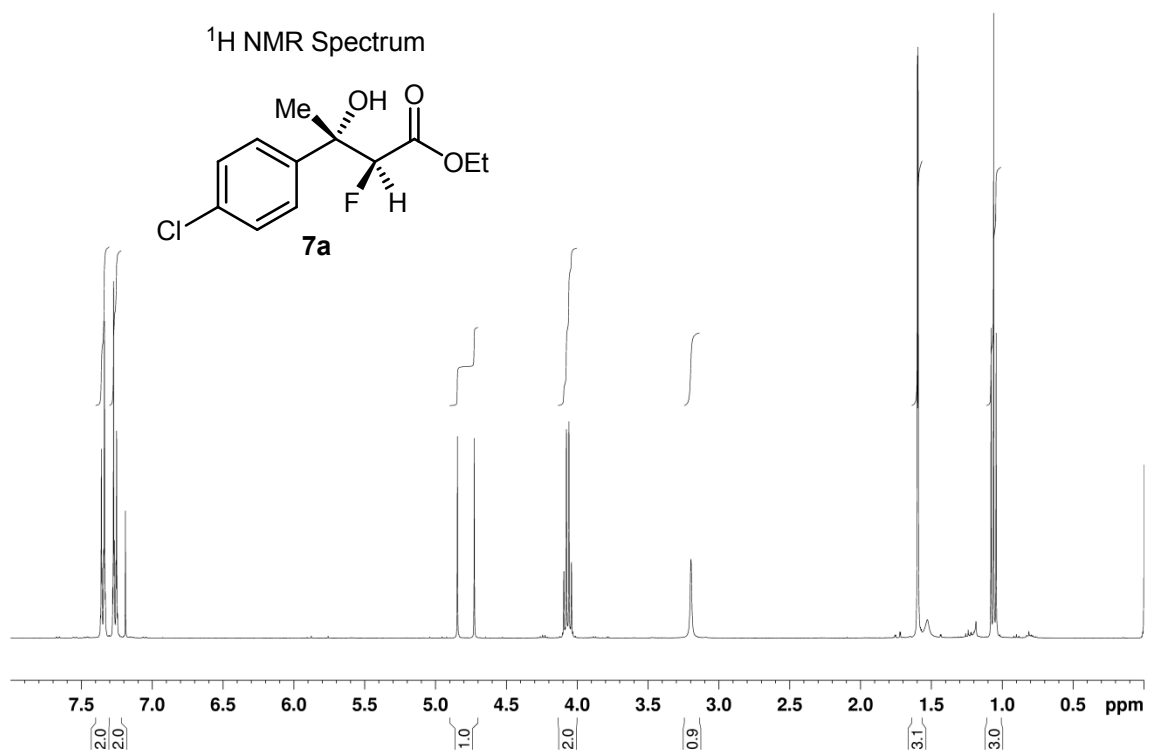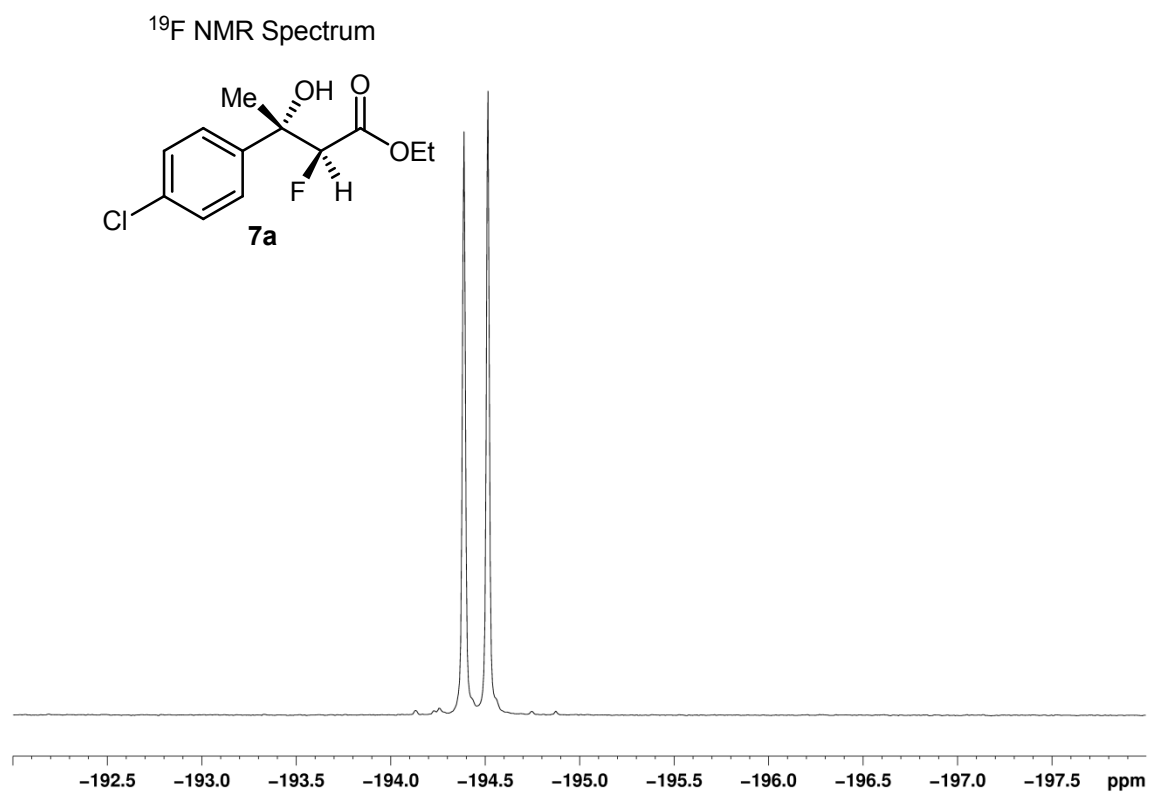

$^{13}\text{C}$  NMR Spectrum

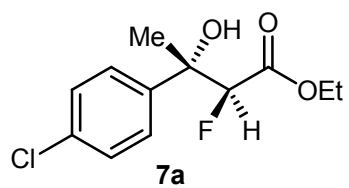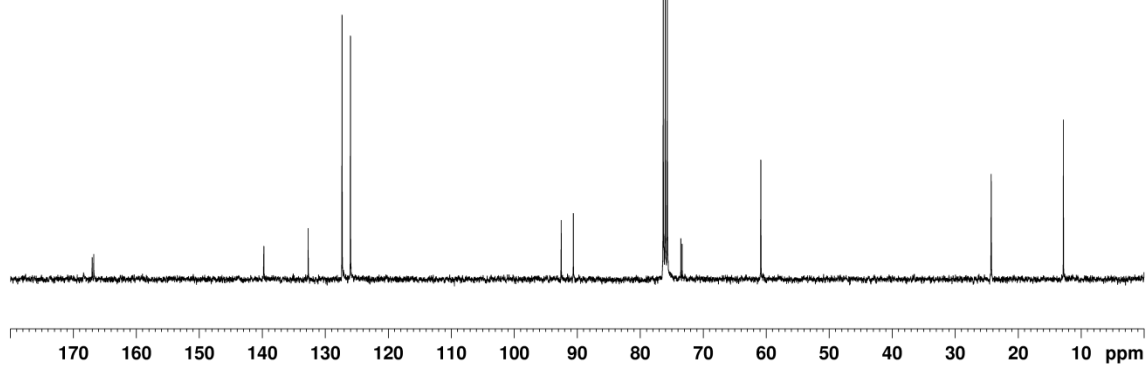

$^1\text{H}$  NMR Spectrum

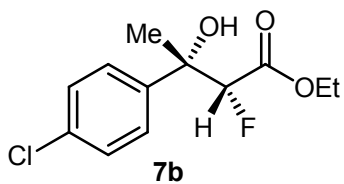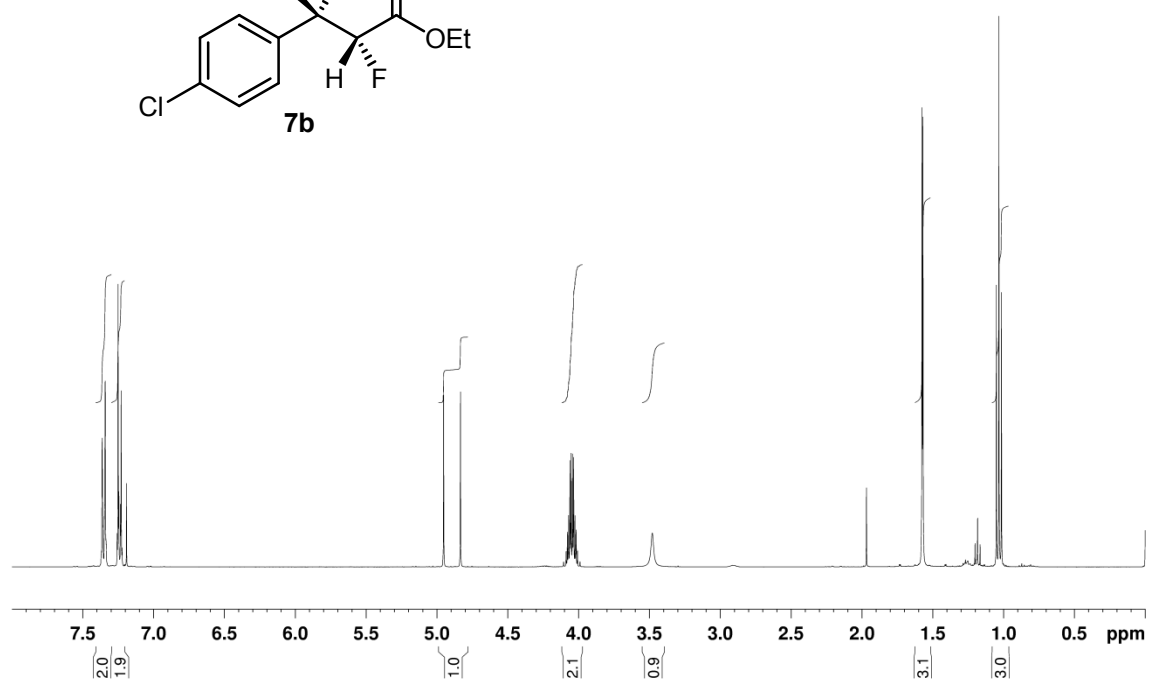

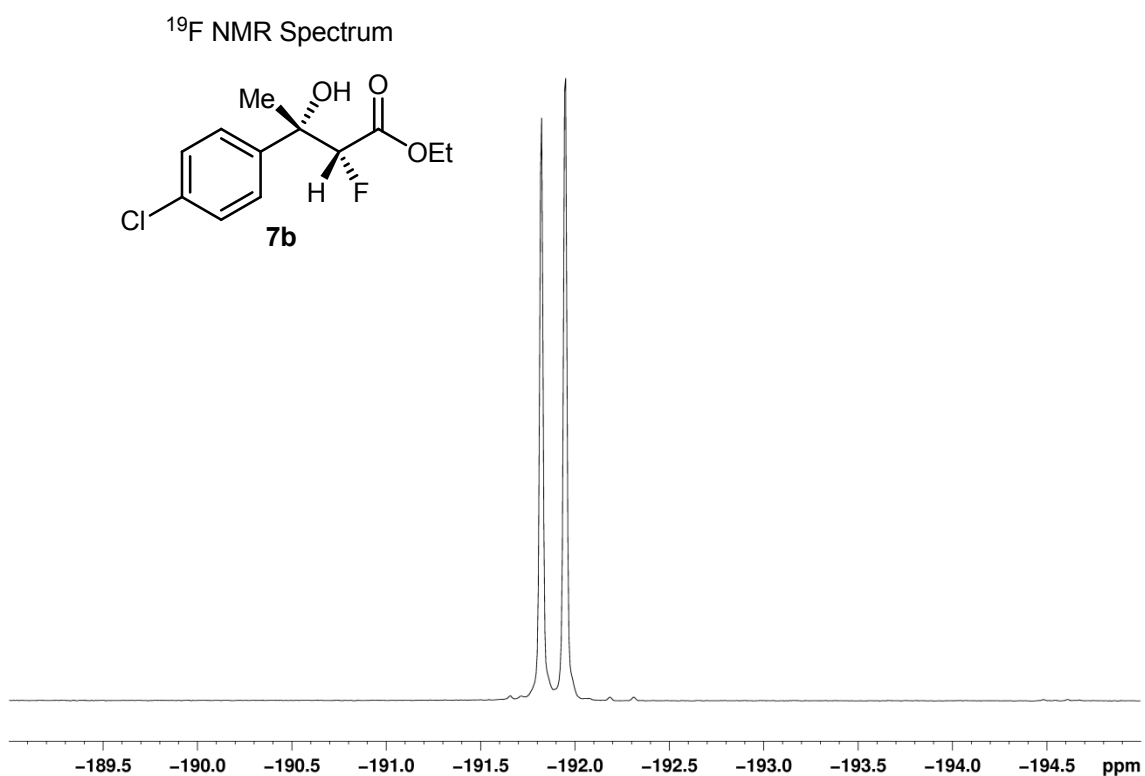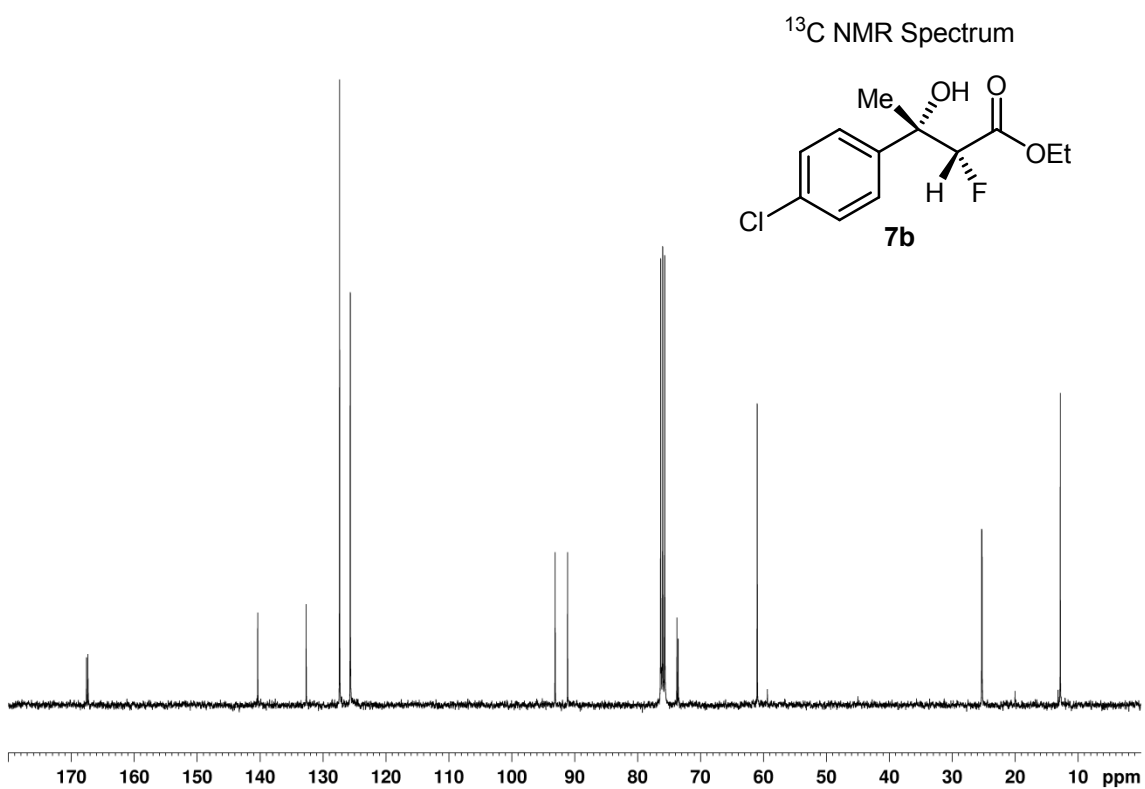

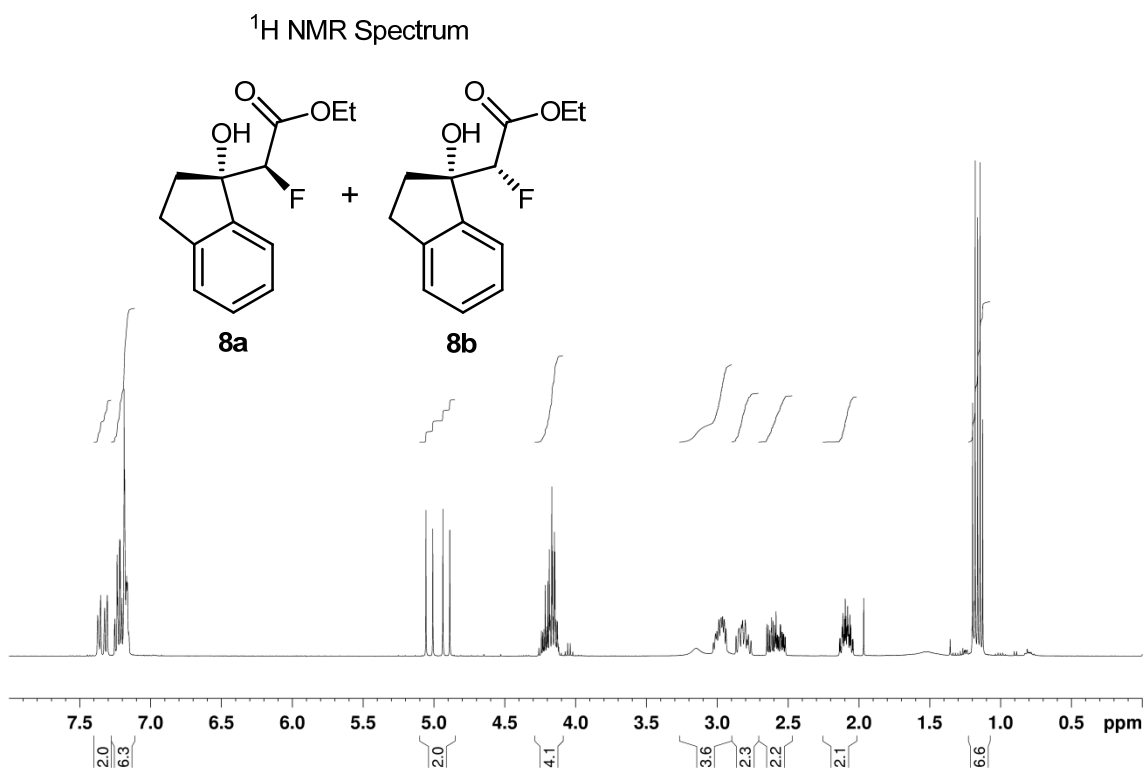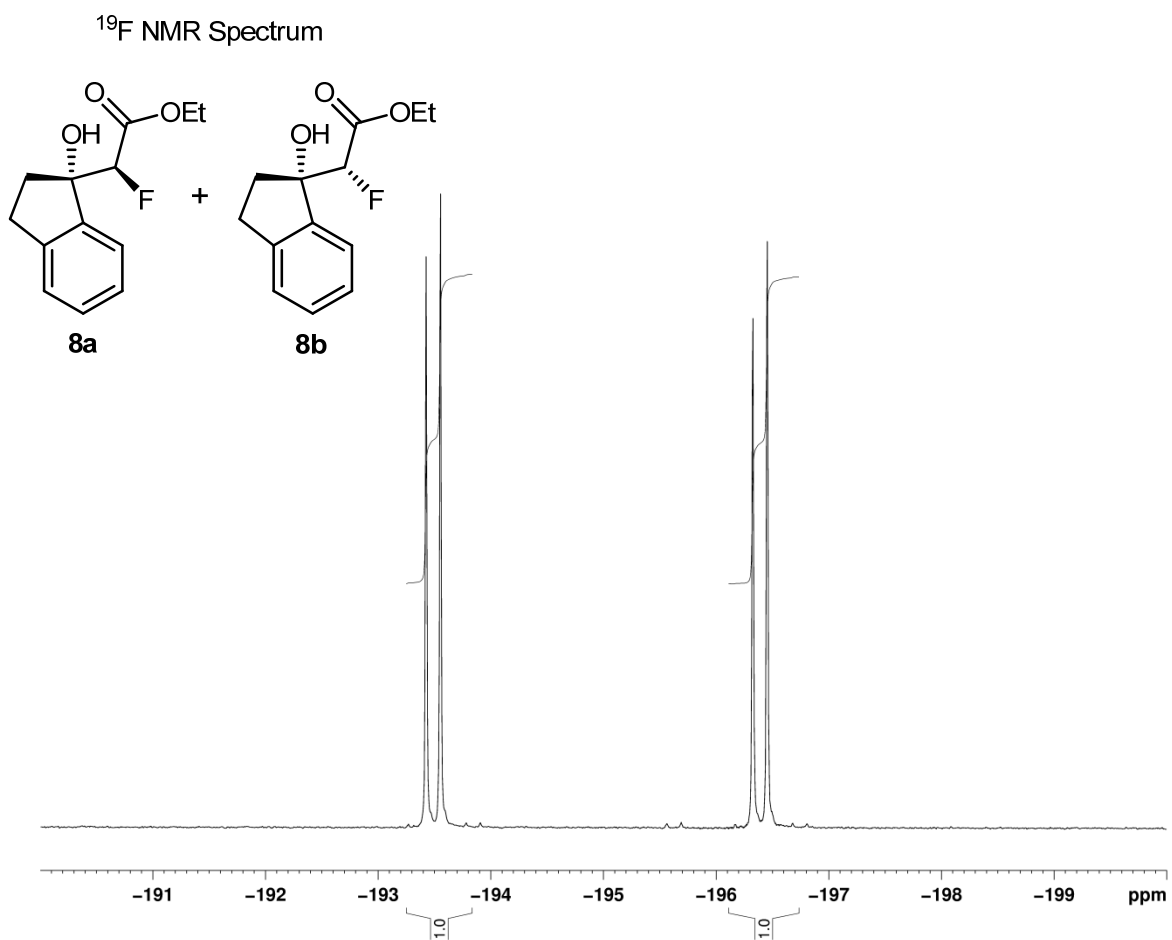

$^{13}\text{C}$  NMR Spectrum

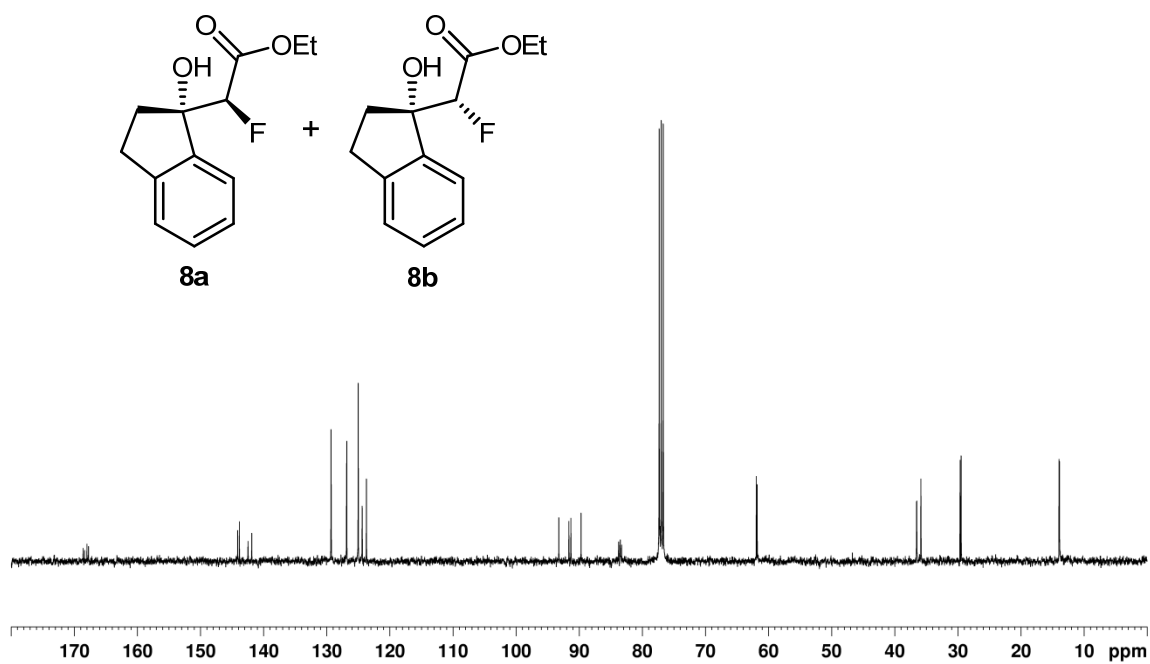

$^1\text{H}$  NMR Spectrum

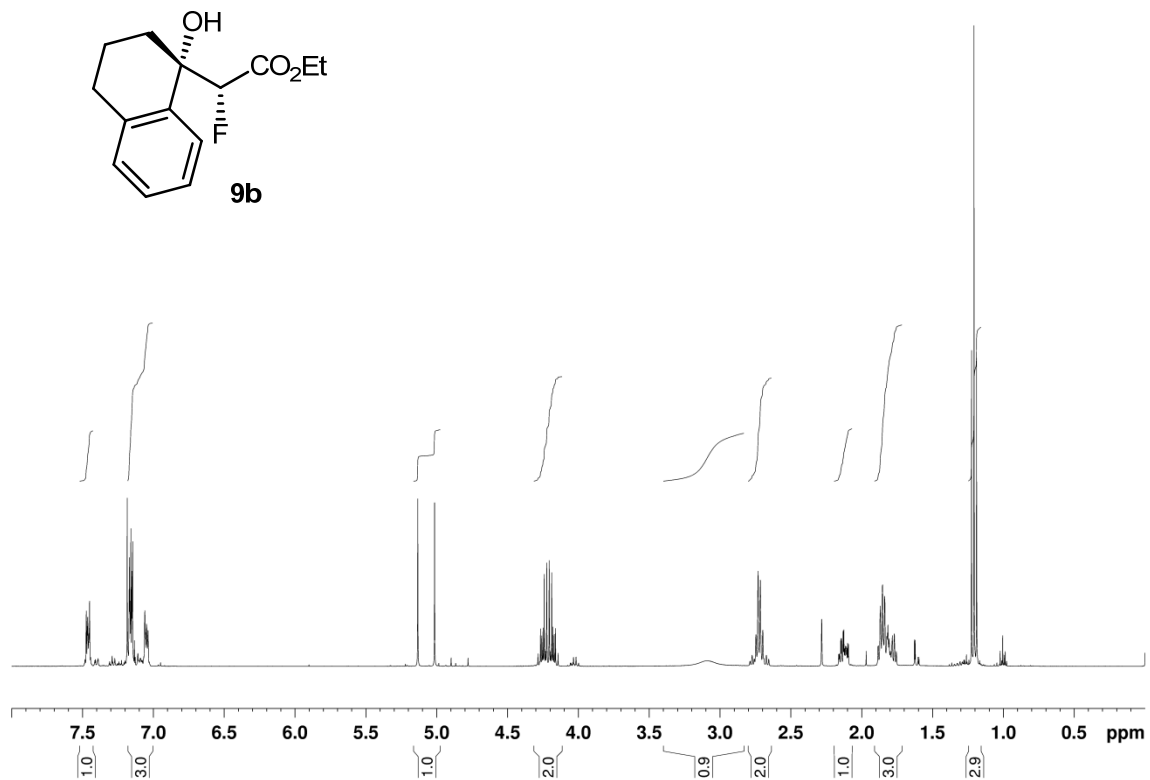



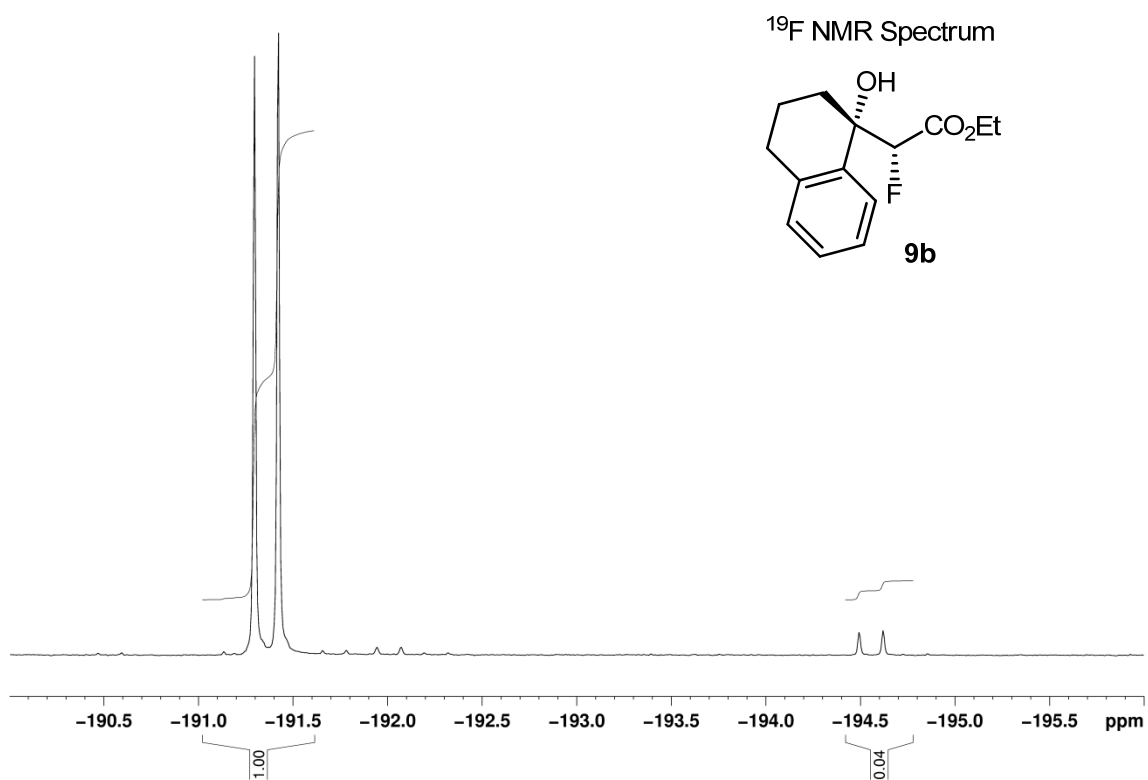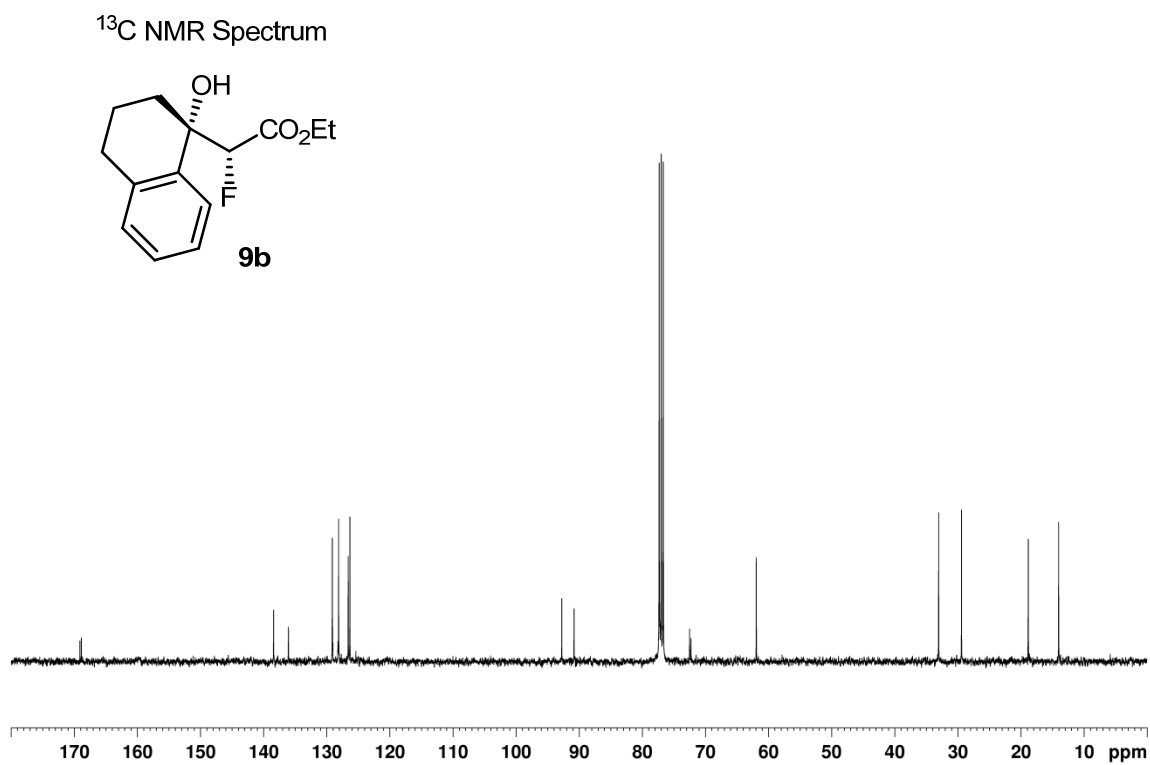

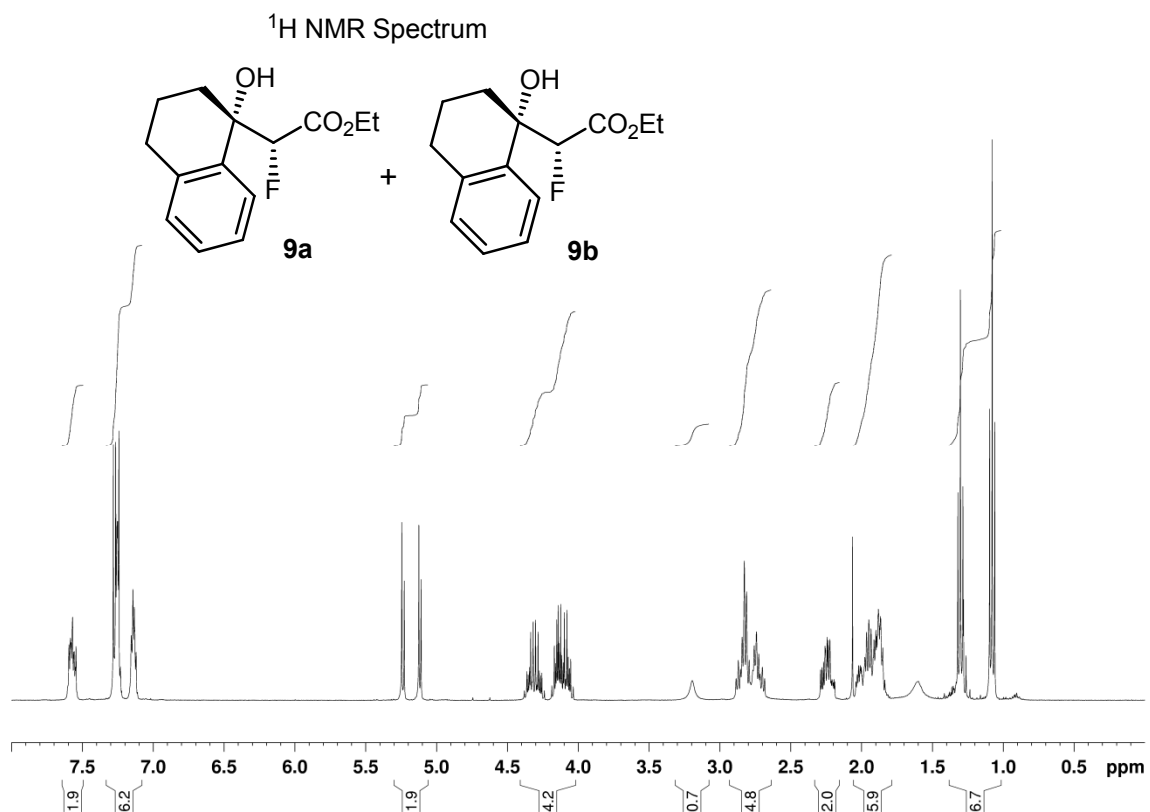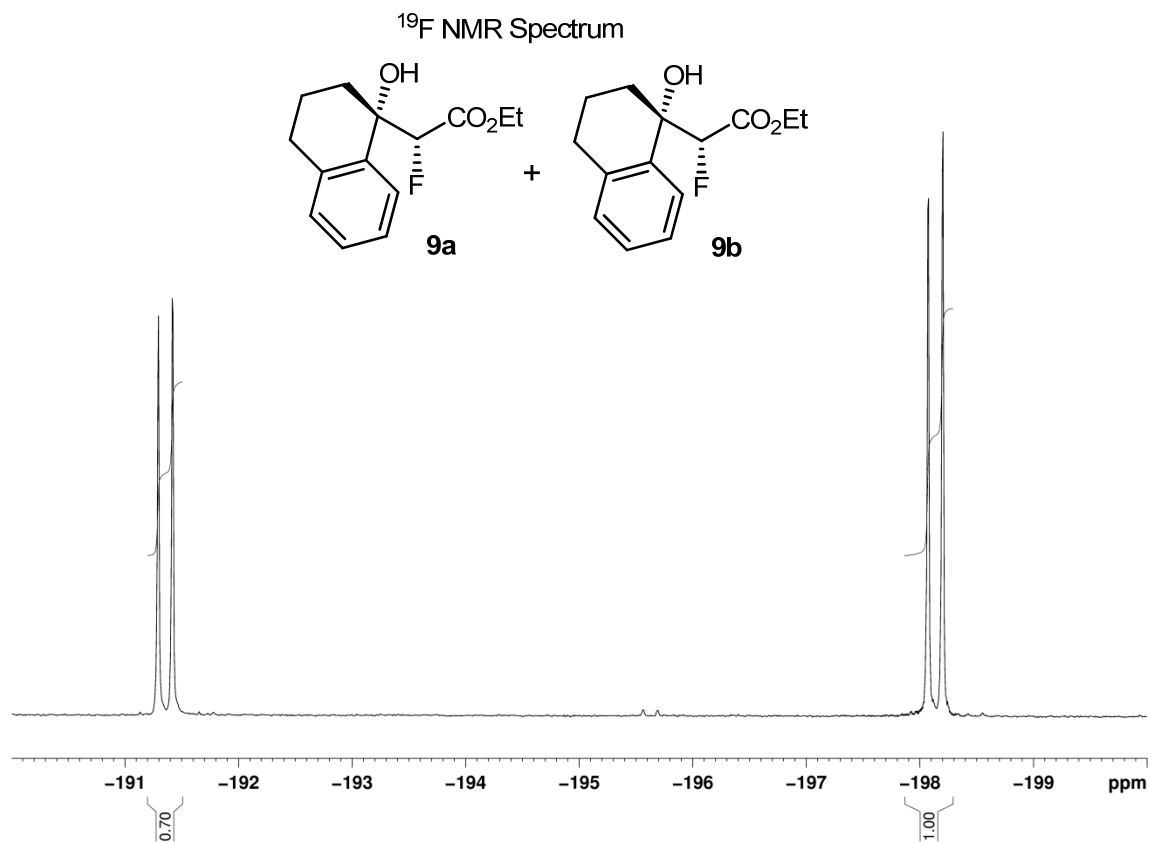

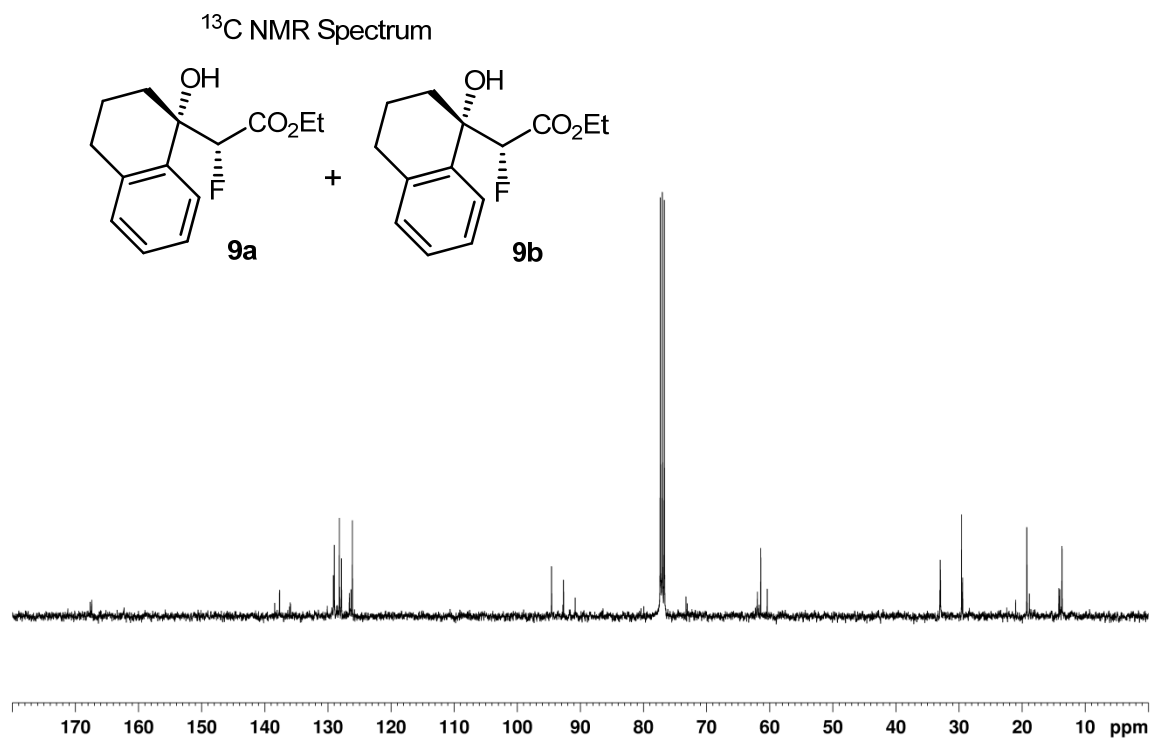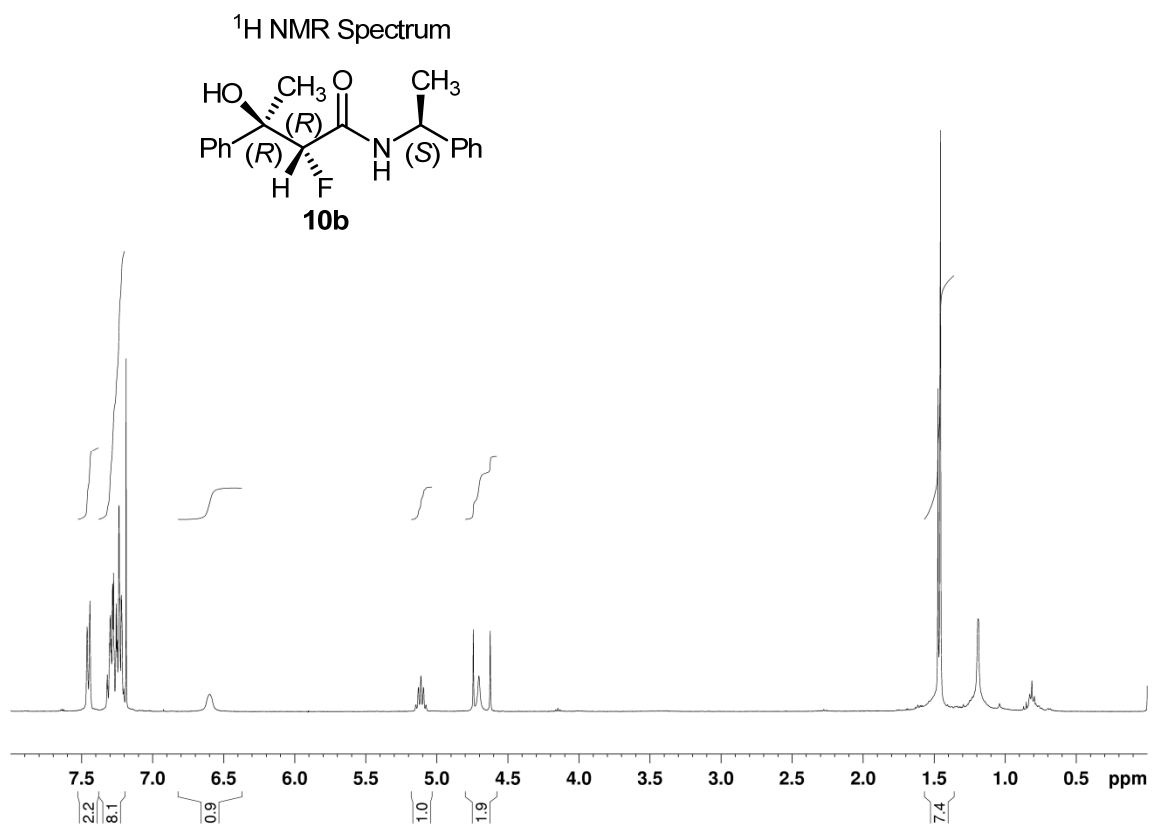

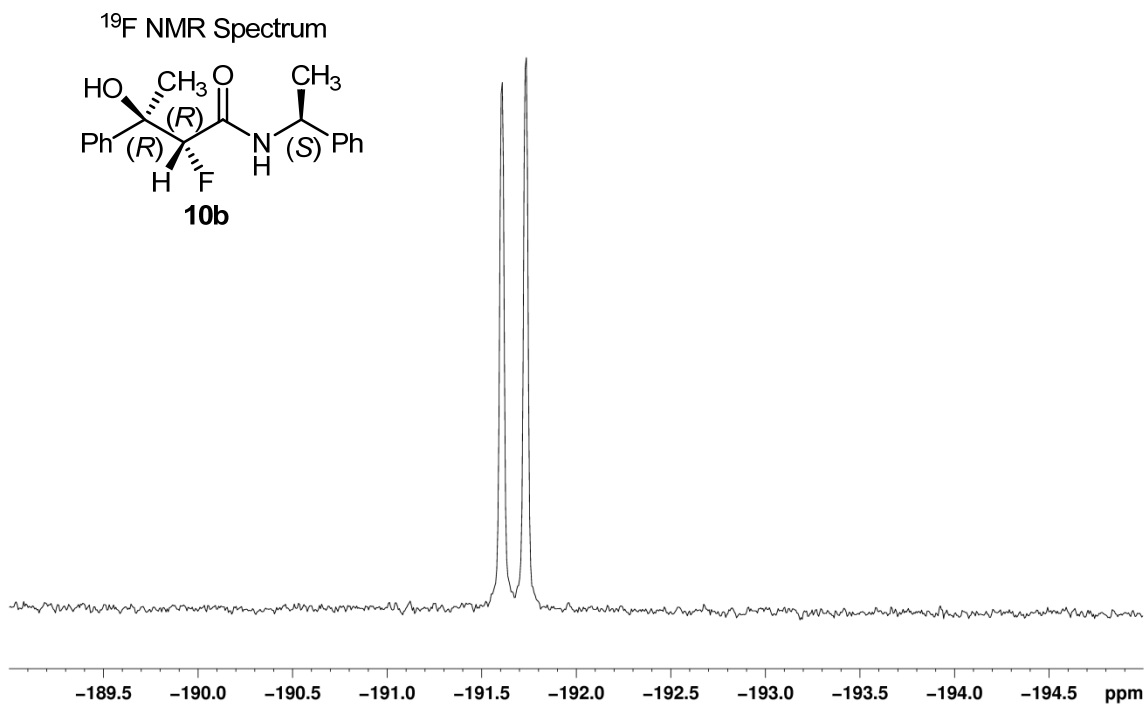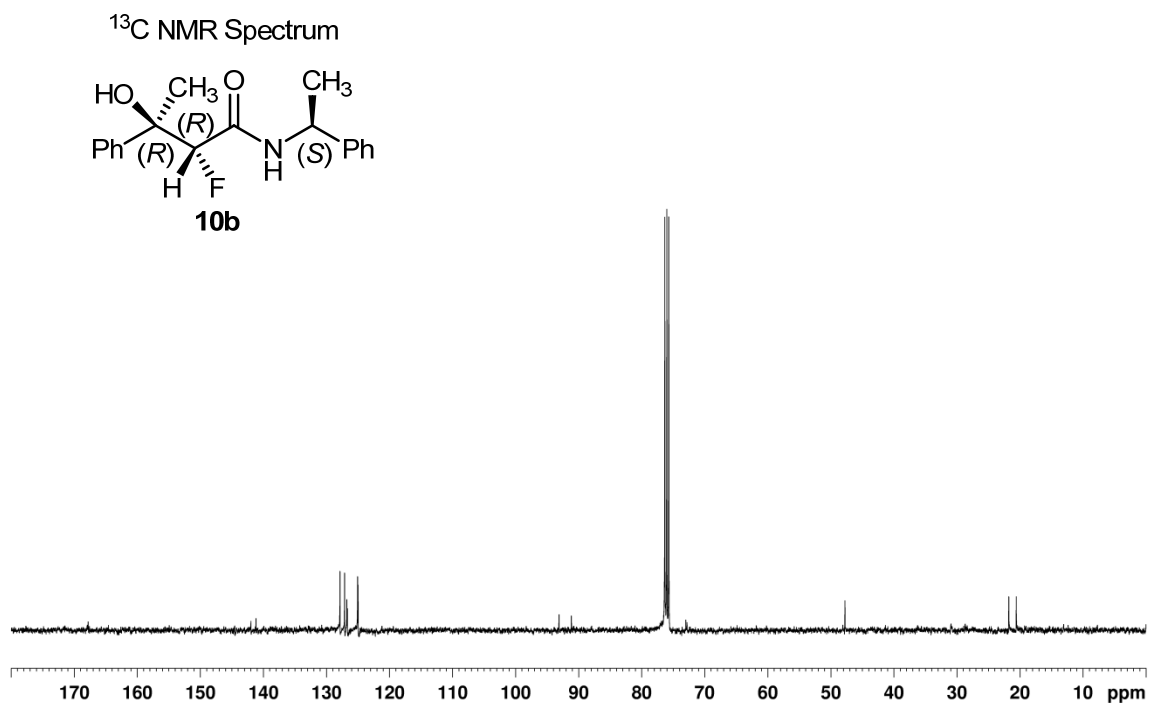

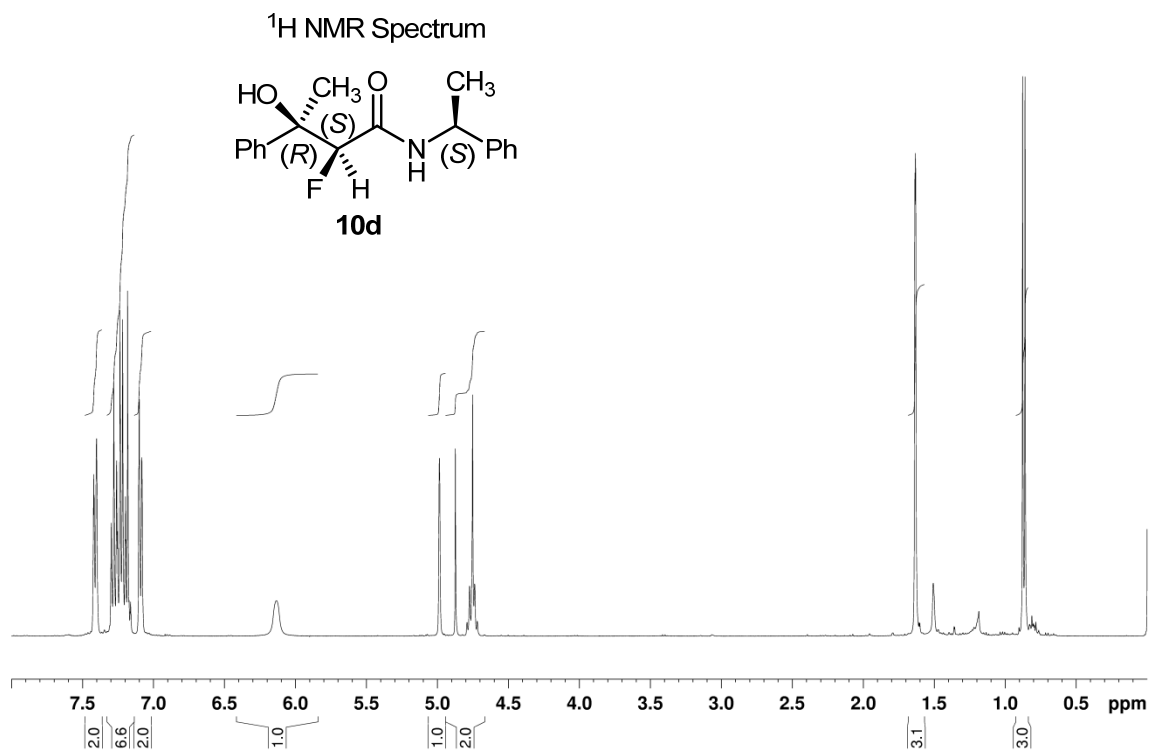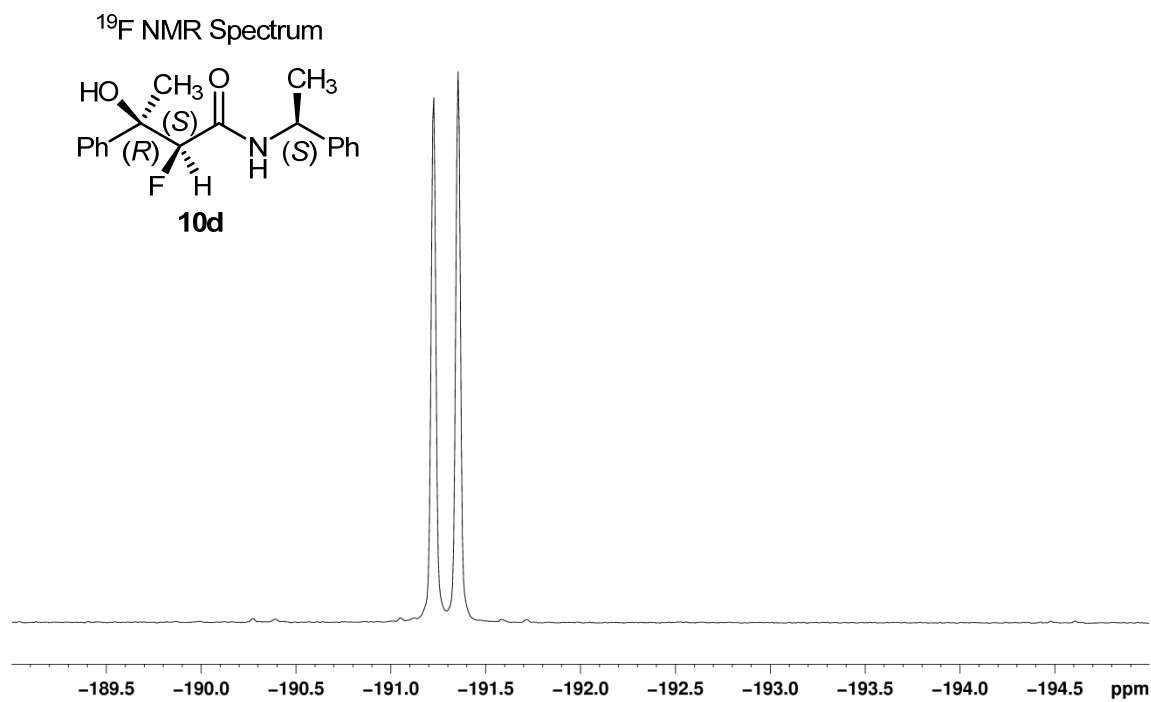

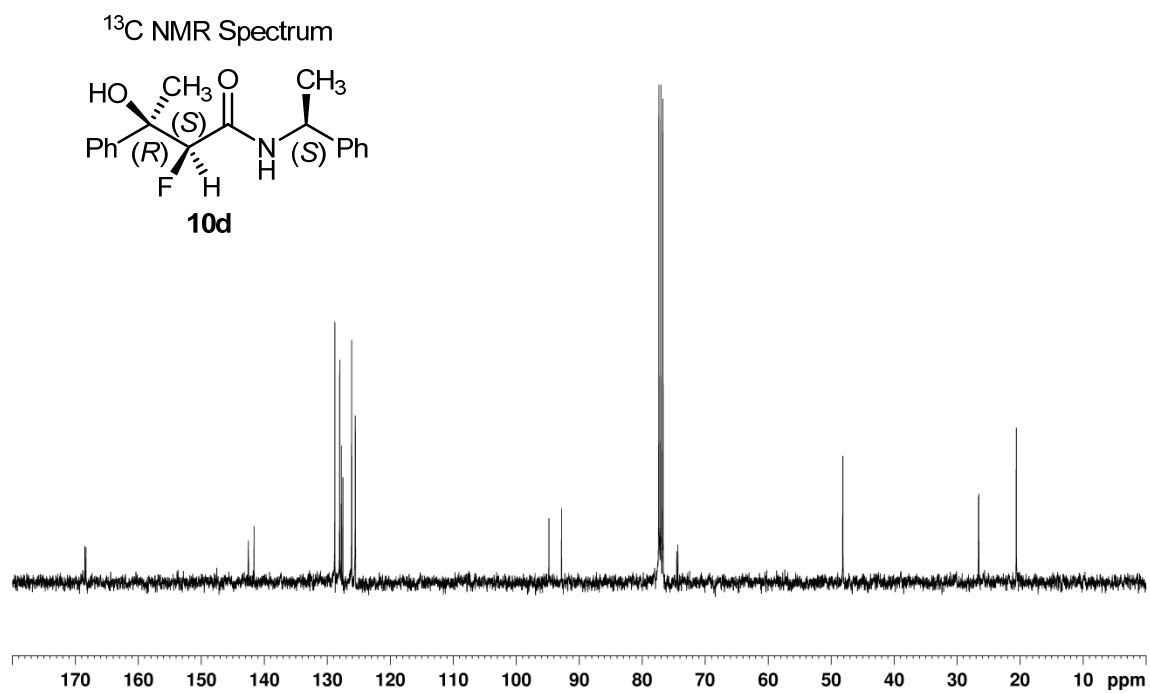

Supplement: c2cc17985g_2.pdf [file c2cc17985g_2.pdf]
